1 **Title: Chemokine signaling links cell cycle progression and cilia formation for**  
2 **left-right symmetry breaking**

3 **Authors:** Jingwen Liu<sup>1#</sup>, Chengke Zhu<sup>4#</sup>, Guozhu Ning<sup>2</sup>, Liping Yang<sup>2</sup>, Yu Cao<sup>1</sup>,  
4 Sizhou Huang<sup>3\*</sup>, Qiang Wang<sup>1, 2, 5, 6 \*</sup>

5 **Affiliations:** <sup>1</sup>School of Life Sciences, University of Science and Technology of  
6 China, Anhui, Hefei 230026, China; <sup>2</sup>State Key Laboratory of Membrane Biology,  
7 Institute of Zoology, University of Chinese Academy of Sciences, Chinese Academy  
8 of Sciences, Beijing 100101, China; <sup>3</sup>Development and Regeneration Key Laboratory  
9 of Sichuan Province, Department of Anatomy and Histology and Embryology,  
10 Chengdu Medical College, Chengdu 610083, China; <sup>4</sup>Key Laboratory of Freshwater  
11 Fish Reproduction and Development, Ministry of Education, Key Laboratory of  
12 Aquatics Science of Chongqing, College of Animal Science in Rongchang Campus,  
13 Southwest University, Chongqing 402460, China; <sup>5</sup>Institute for Stem Cell and  
14 Regeneration, Chinese Academy of Sciences, Beijing 100101, China; <sup>6</sup> Lead Contact.

15

16 # These authors share first authorship on this work.

17 \*Correspondence may be addressed to: Tel: 86-28-62739298; Fax: 86-28-62739298;

18 E-mail: [huangyuy1027@cmc.edu.cn](mailto:huangyuy1027@cmc.edu.cn)

19 \*Correspondence may be addressed to: Tel: 86-10-64807895; Fax: 86-10-64807895;

20 E-mail: [qiangwang@ioz.ac.cn](mailto:qiangwang@ioz.ac.cn)

21

22 **Running title:** Cxcr4a guides cell proliferation and ciliogenesis.

23 **Abstract**

24 Zebrafish dorsal forerunner cells (DFCs) undergo vigorous proliferation during  
25 epiboly and then exit cell cycle to generate Kupffer's vesicle (KV), a ciliated organ  
26 necessary for establishing left-right (L-R) asymmetry. DFC proliferation defects are  
27 often accompanied by impaired cilia elongation in KV, but the functional and  
28 molecular interaction between cell-cycle progression and cilia formation remains  
29 unknown. Here we show that chemokine receptor *Cxcr4a* is required for L-R laterality  
30 by controlling DFC proliferation and KV ciliogenesis. Functional analysis revealed  
31 that *Cxcr4a* accelerates G1/S transition in DFCs and stabilizes *Foxj1a*, a master  
32 regulator of motile cilia, by stimulating Cyclin D1 expression through ERK1/2  
33 signaling. Mechanistically, Cyclin D1-CDK4/6 drives G1/S transition during DFC  
34 proliferation and phosphorylates *Foxj1a*, thereby disrupting its association with  
35 *Psm4b*, a 19S regulatory subunit. This prevents the ubiquitin-independent  
36 proteasomal degradation of *Foxj1a*. Our study uncovers a role for *Cxcr4* signaling in  
37 L-R patterning and provides fundamental insights into the molecular linkage between  
38 cell-cycle progression and ciliogenesis.

39

40 **Keywords:** left-right asymmetry, *cxcr4a*, G1/S transition, ciliogenesis, Cyclin  
41 D1-CDK4/6, *Foxj1a*, *Psm4b*, ubiquitin-independent proteasomal degradation.

42

43

44

45 **Author summary**

46 During the organogenesis of zebrafish L-R organizer named KV, DFCs  
47 proliferate rapidly during epiboly and then exit the cell cycle to differentiate into  
48 ciliated epithelial KV cells. Cell cycle defects in DFCs are often accompanied by an  
49 alteration in KV cilia elongation. However, whether the cell cycle and cilia formation  
50 are mechanistically linked remains as an open question. In this study, we report that  
51 Cxcr4 signaling is required for DFC proliferation and KV ciliogenesis. We reveal that  
52 Cxcl12b/Cxcr4a signaling activates ERK1/2, which then promotes Cyclin D1  
53 expression. Cyclin D1-CDK4/6 accelerates the G1/S transition in DFCs, while also  
54 facilitates cilia formation via stabilization of Foxj1a. Notably, Foxj1 undergoes  
55 proteasomal degradation via Ub-independent pathway during KV organogenesis. Our  
56 study further demonstrates that CDK4 phosphorylates and stabilizes Foxj1a by  
57 disrupting its association with Psm4b, a 19S regulatory subunit. In summary,  
58 Cxcl12b/Cxcr4a chemokine signaling links cell cycle progression and cilia formation  
59 for L-R symmetry breaking via regulating Cyclin D1 expression.

60

61

62

63

64

65

66

## 67 **Introduction**

68 Vertebrates exhibit striking left-right (L-R) asymmetries in the structure and  
69 position of their cardiovascular and gastrointestinal systems. Initially, early embryos  
70 develop symmetrically along the prospective body midline. This embryonic symmetry  
71 is broken during somite stages when an asymmetric fluid flow is generated by motile  
72 cilia within the L-R organizer (LRO), a transient structure located at the posterior end  
73 of the notochord [1]. Specifically, in zebrafish, the ciliated LRO is referred to as  
74 Kupffer's vesicle (KV), which forms from dorsal forerunner cells (DFCs), a group of  
75 superficial cells in the organizer region of the gastrula [2,3]. It has been well  
76 established that the architecture of KV cells and asymmetric KV cilia generate a  
77 counter-clockwise nodal flow. This leads to the asymmetrical expression of early  
78 laterality genes, including *nodal-related southpaw (spaw)* and *pitx2c* in the left lateral  
79 plate mesoderm (LPM), and ultimately the establishment of L-R asymmetric  
80 patterning [4]. The origin of L-R asymmetry is conserved across many vertebrates,  
81 and defects in the establishment of these asymmetries can result in a broad spectrum  
82 of birth defects, often including congenital heart malformations [5,6].

83 The progression of cells through the G1 and S phases of the cell cycle is tightly  
84 controlled by the sequential activation of a family of serine-threonine kinases known  
85 as the cyclin-dependent kinases (CDKs). CDK4 and its homologous CDK6 are  
86 activated by D-type cyclins in early to mid-G1 phase, whereas CDK2 is activated by  
87 E- and A-type cyclins during late G1 and S phase, respectively [7]. Recent evidence  
88 indicates that cell cycle dynamics have emerged as a key regulator of stem cell fate

89 decisions [8-10]. Specifically, cyclin D proteins have been shown to activate CDK4/6,  
90 which restricts the activity of Smad2/3 in late G1 phase and results in a switch from  
91 endoderm to neuroectoderm potential in human pluripotent stem cells [11]. The G1  
92 cyclin proteins together with their associated CDKs also play essential, direct roles in  
93 the maintenance of cell stemness and in the regulation of cell fate specification in  
94 mouse embryonic stem cells by phosphorylation and stabilization of the core  
95 pluripotency factors, Nanog, Sox2, and Oct4 [12]. In addition, CDK4/CyclinD1  
96 overexpression has been shown to prevent G1 lengthening and functions to inhibit  
97 neurogenesis in mouse embryos [13]. In zebrafish, DFCs vigorously proliferate and  
98 collectively migrate towards the vegetal pole during epiboly stages. They then cluster  
99 and differentiate into polarized epithelial cells of KV [4,14,15]. Interestingly, DFC  
100 proliferation defects are often accompanied by impaired cilia elongation in KV [16],  
101 indicating a possible connection between cell-cycle events and KV cilia formation.  
102 However, the underlying mechanism remains poorly understood.

103 Foxj1, a forkhead domain-containing transcription factor that is expressed in  
104 various ciliated tissues, has been associated with motile cilia formation and L-R axis  
105 development in mammals [17,18]. In zebrafish, two *foxj1* paralogs have been  
106 identified, including *foxj1a* and *foxj1b* [19]. *foxj1a* has been shown to be highly  
107 expressed in the DFCs toward the end of gastrulation and plays a primary role in KV  
108 ciliogenesis, while *foxj1b* is expressed in the otic vesicle where it has been shown to  
109 regulate motile cilia formation [19,20]. The expression level of *foxj1a* transcripts has  
110 been shown to be regulated by the Hedgehog, Wnt/ $\beta$ -catenin and FGF signaling

111 pathways [19,21,22]. *Lnx2b*, a RING domain containing E3 ubiquitin (Ub) ligase,  
112 which is specifically expressed in the migratory DFCs and developing KV, plays a  
113 critical role in the establishment of L-R laterality. This indicates the involvement of  
114 protein ubiquitination in the determination of L-R asymmetry [23]. However, whether  
115 the function of *Foxj1* protein in KV ciliogenesis is regulated by Ub modification  
116 remains unknown.

117 Chemokines are small (8-14 kDa) vertebrate-specific proteins that can be  
118 categorized into four subgroups according to the presence and position of conserved  
119 cysteine residues (C, CC, CXC, and CX3C) [24]. Among chemokines of the CXC  
120 class, the stromal cell-derived factor 1 (SDF-1/CXCL12) and its receptor CXCR4,  
121 which were first identified due to their primary role in leukocyte homing, have been  
122 implicated in the regulation of cell adhesion and migration during embryonic  
123 development [24-26]. Interestingly, in zebrafish, two *Cxcl12* ligands and two *Cxcr4*  
124 receptors were found to be expressed across a wide range of cell types and  
125 developmental stages, and were found to act as discrete pairs to direct cell migration  
126 [25]. *Cxcl12a-Cxcr4b* signaling controls processes such as the directional migration  
127 of primordial germ cells, the collective migration of the lateral line primordium, and  
128 the formation of the trunk lymphatic network [27-29]. On the other hand, the  
129 *Cxcl12b-Cxcr4a* axis has been shown to play a role in endodermal morphogenesis,  
130 vascular system patterning, and the migration and prechondrogenic condensation of  
131 cranial neural crest cells [30-33]. It has been shown previously that *cxcr4a* and *cxcr4b*  
132 possess mutually exclusive expression patterns in the majority of cell lineages [34].

133 For example, *cxcr4a* but not *cxcr4b* is expressed in the primordium of KV [34]. While  
134 *cxcr4b* expression reveals an asymmetric pattern in habenular neurogenesis, the  
135 *cxcr4b* mutant *odysseus* displays no obvious phenotype in L-R epithalamic  
136 asymmetry [35]. These observations bring into question whether the signaling  
137 cascades initiated by *Cxcl12b* and *Cxcr4a* play a role in the establishment of L-R  
138 asymmetry.

139 Here, we provide evidence suggesting that the *Cxcl12b*-*Cxcr4a* axis is essential  
140 for L-R asymmetric development. *Cxcr4a<sup>um20</sup>* mutants were found to exhibit poor  
141 DFC proliferation and abnormal KV cilia formation. Specifically, depletion of *cxcr4a*  
142 in DFCs was found to lead to a significant decrease in ERK1/2 signal activation,  
143 which was essential for the expression of *cyclin D1*. Subsequent biochemical and  
144 functional approaches demonstrated that Cyclin D1-CDK4/6 functions to accelerate  
145 the G1/S transition to promote DFC proliferation and stabilize *Foxj1a* for cilia  
146 formation. Mechanistically, CDK4 phosphorylates *zFoxj1a* at T102 and then disrupts  
147 its association with *Psm4b*, which in turn prevents the ubiquitin-independent  
148 proteasomal degradation of *Foxj1a* protein. Therefore, *Cxcl12b*/*Cxcr4a* chemokine  
149 signaling links cell cycle progression and cilia formation for L-R symmetry breaking  
150 via regulating Cyclin D1 expression.

151

## 152 **Results**

### 153 ***Cxcl12b*-*Cxcr4a* axis is required for L-R laterality**

154 *cxcr4a* was previously found to be expressed in KV progenitors at the end of

155 gastrulation [34]. To address the detailed expression patterns of *cxcr4a*, whole mount  
156 *in situ* hybridization was carried out during early zebrafish embryogenesis. As shown  
157 in S1A Fig, *cxcr4a* expression was observed in endoderm cells and migrating DFCs  
158 throughout gastrulation. At early somite stages, concomitant with the onset of anterior  
159 neural plate expression, *cxcr4a* was also found to be activated in the developing KV  
160 cells besides the central lumen (S1B Fig). Therefore, we hypothesized that *cxcr4a*  
161 might play a critical role in KV organogenesis and L-R asymmetric patterning.

162 We then set out to test whether *cxcr4a* is required for L-R development in  
163 *cxcr4a<sup>um20</sup>* embryos carrying loss-of-function mutations in *cxcr4a* gene, which lead to  
164 defects in lateral dorsal aorta formation (S1C Fig) [33]. In order to analyze the  
165 laterality information in homozygous *cxcr4a<sup>um20</sup>* mutants, we examined cardiac  
166 development by WISH against cardiac myosin light chain 2 (*cmlc2*). At 48 hours post  
167 fertilization (hpf), the majority of wild-type embryos showed a heart tube looping to  
168 the right (D-loop) (Fig 1A and 1B). However, the heart localization became  
169 randomized in *cxcr4a<sup>um20</sup>* mutants, of which 21% showed a “no-looping” or reversed  
170 “left-looping” heart (L-loop) (Fig 1A and 1B). In addition, in *cxcr4a<sup>um20</sup>* embryos, the  
171 livers were also observed to be randomized in laterality as revealed by *hhex*  
172 expression (Fig 1C and 1D).

173 Because *cxcr4a* depletion would impair endoderm cell migration during  
174 gastrulation and cause bilateral duplication of endodermal organs such as the liver  
175 [30], we injected a previously validated morpholino that targets *cxcr4a* (*4a* MO) into  
176 embryonic yolk at the mid-blastula stage (256-cell stage) to specifically block *cxcr4a*



177 activity in DFC/KV cells, as demonstrated previously [36]. In comparison to injection  
178 with a standard control morpholino (cMO), injection of *4a* MO led to similar laterality  
179 abnormalities as observed in *cxcr4a<sup>um20</sup>* mutants (Fig 1E and 1F). This suggests that  
180 the organ localization defects are not secondary effects of impaired endoderm  
181 migration. Therefore, the *cxcr4a* expression in DFC/KV cells is required for L-R  
182 laterality. In addition, the deficiency of *cxcl12b* in *cxcl12b<sup>mu100</sup>* mutants [37], was also  
183 found to result in laterality defects (Fig 1G and 1H), indicating that the  
184 Cxcl12b-Cxcr4a signaling pathway is critical for L-R symmetry breaking.

185 Because organ laterality is regulated by evolutionally conserved asymmetric L-R  
186 gene expression in vertebrates, we next examined the expression patterns of *spaw* and  
187 its downstream gene *pitx2c* [1,38]. At the late somite stages, we observed *spaw* and  
188 *pitx2c* expression in the left LPM in wild-type embryos, whereas expression of these  
189 genes was found to be bilateral or absent in *cxcr4a<sup>um20</sup>* mutants and DFC<sup>4a</sup> MO  
190 embryos (Fig 1I-1N). Interestingly, the bilateral expression domain of *spaw* in a  
191 subset of *cxcr4a<sup>um20</sup>* mutants was located in the more posterior region in the LPM (Fig  
192 1I), indicating a delay in the anterior spreading of *spaw* expression.

193 Collectively, these results demonstrate a sustaining expression of *cxcr4a* in the  
194 DFC/KV cells and implicate a crucial role of Cxcl12b-Cxcr4a chemokine signaling in  
195 L-R laterality determination.

196

### 197 **Ablation of *cxcr4a* compromises KV organogenesis and ciliogenesis**

198 To determine whether a loss of *cxcr4a* alters KV morphogenesis, we first

199 examined the formation of DFC clusters during gastrulation in *cxcr4a<sup>um20</sup>* mutants  
200 carrying the transgenic DFC/KV reporter *sox17:GFP*. We observed that, in both  
201 wild-type embryos and *cxcr4a<sup>um20</sup>* mutants, the GFP-positive DFCs were maintained  
202 as a cohesive group and migrated towards the vegetal pole during mid- to  
203 late-gastrulation (S2A Fig). Meanwhile, in comparison to control embryos, *cxcr4a<sup>um20</sup>*  
204 mutants exhibited a normal expression pattern of *sox17* transcripts in the DFC clusters  
205 (S2B Fig). Based on these observations, we concluded that *cxcr4a* is unnecessary for  
206 the specification, clustering, and collective migration of DFCs.

207 We then examined the morphology of KV in live embryos at the 10-somite stage,  
208 at which point KV was well formed [4]. Wild-type embryos exhibited a normal  
209 button-like KV at the terminus of the notochord, as observed under bright-field  
210 microscopy (Fig 2A). In contrast, a large majority of *cxcr4a<sup>um20</sup>* mutants displayed a  
211 smaller or tiny/absent KV (Fig 2A and 2B). In order to monitor the dynamic changes  
212 during KV formation, we carried out *in vivo* time-lapse image analysis on  
213 *cxcr4a*-deficient *Tg(sox17:GFP)* embryos from the 1- to 6-somite stages. DFCs were  
214 found to have already rearranged into a single rosette concurrent with the formation of  
215 the preliminary lumen in 1-somite stage wild-type and *cxcr4a<sup>um20</sup>* mutant embryos  
216 (Fig 2C). However, the GFP-positive KV appeared to be dramatically smaller in  
217 *cxcr4a<sup>um20</sup>* embryos in comparison to control animals from the 3- to 6-somite stages  
218 (Fig 2C). We next looked into the apical-basal polarity of KV epithelial cells, which is  
219 critical for the correct establishment of L-R asymmetry [39]. Immunostaining  
220 experiments revealed that the distributions of the basal-lateral marker E-cadherin and

221 the apical marker aPKC in KV epithelial cells of 10-somite stage *cxcr4a<sup>um20</sup>* embryos  
222 were correct (S2C-S2D Fig). These observations suggest that *cxcr4a* is critical for  
223 organ size control, but is not required for epithelial cell polarization during KV  
224 organogenesis.

225 Monocilia in KV are known to generate a counter-clockwise fluid flow, which  
226 creates asymmetrical signals required to break L-R symmetry [4]. We next analyzed  
227 KV cilia formation by probing for acetylated tubulin ( $\alpha$ -Tubulin) in the *cxcr4a<sup>um20</sup>*  
228 embryos at the 10-somite stage. We found that, in comparison with control embryos,  
229 *cxcr4a<sup>um20</sup>* mutants exhibited a significant decrease in cilia number and a steady  
230 reduction in cilia length (Fig 2D-2F). We then sought to determine whether the KV  
231 directional fluid flow was altered in *cxcr4a<sup>um20</sup>* mutants. Fluorescent beads were  
232 injected into KVs at the 6-somite stage and the movements of the beads were tracked  
233 at the 10-somite stage. The fluorescent beads moved in a persistent counter-clockwise  
234 fashion in wild-type embryos, whereas they exhibited no directional flow in  
235 *cxcr4a*-deficient embryos (Fig 2G; S1-S2 Videos). Therefore, these results indicated  
236 that *cxcr4a* is indispensable for KV ciliogenesis and cilia-driven fluid flow.

237

### 238 **Absence of *cxcr4a* attenuates G1/S transition and zFoxj1a protein expression**

239 Our studies suggest that *cxcr4a* deficiency leads to smaller KV size as well as  
240 fewer KV cilia. Interestingly, the majority of the KV epithelial cells in *cxcr4a* mutants  
241 exhibited an intact apical-basal polarity and formed notably shortened cilia (Fig 2D  
242 and S3C-S3D Fig). This suggests that the altered KV cilia numbers may be caused by

243 defects in cell proliferation. To address this issue, we first examined the proliferation  
244 profile of DFC/KV cells by performing bromodeoxyuridine (BrdU) incorporation  
245 assays in *Tg(sox17:GFP)* embryos during gastrulation and early somite stages.  
246 Consistent with previous reports [16], approximately 70% of DFCs were positively  
247 stained with BrdU at the mid-gastrulation stage, whereas very few BrdU-positive cells  
248 were observed in the developing KV at the bud and the 6-somite stages (Fig 3A and  
249 3B), suggesting that vigorous proliferation occurs in DFCs during epiboly stages and  
250 then declines at the end of gastrulation. Impressively, we found a dramatic decrease of  
251 the BrdU-positive DFC number in *cxc4a*-deficient embryos at mid-gastrulation stage  
252 (Fig 3C and 3D), indicating a crucial requirement of *cxc4a* in DFC proliferation.

253 We next examined the detailed effects of *cxc4a* deficiency on DFC cycle  
254 progression in *Tg(sox17:GFP;EF1α:mKO2-zCdt1(1/190))* double transgenic embryos,  
255 a model in which cells in G1 phase exhibit red nuclear fluorescence [40]. Because the  
256 G1/S transition is very short in cells which undergo rapid mitotic cycles [40], we were  
257 unable to identify any mKO2-zCdt1-positive DFCs in both control embryos and  
258 *cxc4a<sup>um20</sup>* mutants during gastrulation. Interestingly, while the majority of cells in the  
259 developing KV enter into a quiescent state at the end of gastrulation (Fig 3A and 3B),  
260 we observed no or only few KV progenitors with mKO2-zCdt1 fluorescence (Fig  
261 3E-3H). These results, combined with the previous observation that the mKO2-zCdt1  
262 signal was highlighted in differentiated cells, including postmitotic neurons and  
263 muscle cells after the 10-somite stage [40], imply that there exist limitations in the  
264 ability to dissect cell-cycle behavior using this fluorescent indicator in early zebrafish

265 embryos. However, *cxcr4a* depletion resulted in a marked proportion of KV  
266 progenitors with robust mKO2-zCdt1 expression, indicating impaired G1/S transition  
267 and an apparent lengthening of the G1 phase (Fig 3E-3H). Nevertheless, our results  
268 suggest that Cxcr4a-mediated chemokine signaling is responsible for driving DFC  
269 proliferation by accelerating the G1/S transition. This provides an explanation for the  
270 smaller KV size which was observed in *cxcr4a<sup>um20</sup>* mutants.

271 Because zebrafish Foxj1a (zFoxj1a) is a master regulator of KV ciliogenesis  
272 [19,20], we then sought to determine whether zFoxj1a expression was affected in  
273 *cxcr4a<sup>um20</sup>* mutants. *In situ* hybridization analysis demonstrated normal expression  
274 levels of *zfoxj1a* transcripts in *cxcr4a<sup>um20</sup>* embryos during gastrulation (S3 Fig). In  
275 contrast, expression levels of zFoxj1a proteins were clearly decreased in *cxcr4a<sup>um20</sup>*  
276 mutants as revealed by immunostaining and western blot experiments (Fig 3I and 3J).  
277 These analyses provide strong evidence that Cxcr4a signaling is responsible for  
278 controlling KV ciliogenesis through regulation of zFoxj1a protein expression at the  
279 post-transcription level.

280

## 281 **Cxcr4a-ERK1/2 cascade controls DFC proliferation by regulating cyclin D1** 282 **expression**

283 The Cxcl12-Cxcr4 axis is known to regulate cell-cycle progression through  
284 GSK-3 $\beta$ / $\beta$ -catenin and ERK1/2 signaling pathways [41-43]. To determine which of  
285 these candidate pathways mediates Cxcr4-regulated DFC proliferation, *cxcr4a<sup>um20</sup>*  
286 mutant embryos were immunostained with antibodies against  $\beta$ -catenin or

287 phosphorylated ERK1/2 (p-ERK1/2) at the 75%-epiboly stage. No obvious changes in  
288 the cellular distribution of endogenous  $\beta$ -catenin in DFCs were observed in *cxcr4a<sup>um20</sup>*  
289 mutants (S4 Fig), indicating that GSK-3 $\beta$ / $\beta$ -catenin signaling is not altered with  
290 *cxcr4a* depletion. However, we found a robust expression of p-ERK1/2 in wild-type  
291 DFCs, which was nearly abolished in *cxcr4a*-deficient cells (Fig 4A). Strikingly,  
292 DFC-specific overexpression of MEK1<sup>S219D, S223D</sup>, a constitutively activated version of  
293 MEK1 (caMEK1) [44], rescued the L-R defects in *cxcr4a<sup>um20</sup>* mutants in a  
294 dose-dependent manner (Fig 4B-4E). Therefore, these results demonstrate a role for  
295 ERK1/2 signaling downstream of Cxcr4 in organ laterality.

296 Among the cell-cycle-regulatory genes, Cyclin D1 expression is known to be  
297 specifically activated by the Cxcr4a-ERK1/2 cascade to promote cell proliferation  
298 [41,42,45]. Consistent with these previous studies, double fluorescence *in situ*  
299 hybridization analyses indicated a dramatic reduction in *cyclin D1* expression in  
300 *cxcr4a*-deficient DFCs (Fig 4F). In addition, the introduction of caMEK mRNA  
301 counteracted the *cxcr4a* depletion effects on *cyclin D1* expression (Fig 4F). Cell cycle  
302 progression from G1 to the S phase is governed by CDK4/6 and CDK2, which are  
303 activated by D-type and E- or A-type cyclins, respectively [7]. Interestingly, upon  
304 exposure of wild-type embryos to PD0332991, a selective CDK4/6 inhibitor [46],  
305 from the shield stage to the bud stage, the resulting animals exhibited L-R defects  
306 similar to those observed in *cxcr4a<sup>um20</sup>* mutants (Fig 4G and 4H). At the same time,  
307 embryos treated with CYC202, a selective CDK2 inhibitor [47], showed no  
308 significant changes in laterality development (Fig 4G and 4H). These results suggest

309 that Cyclin D1-CDK4/6 complexes play critical roles in DFC proliferation and L-R  
310 asymmetric development. Importantly, reintroduction of *cyclin D1* into DFCs was  
311 found to relieve the inhibition of cell proliferation, the reduction of KV size, and the  
312 defects of organ laterality in *cxcr4a<sup>um20</sup>* mutants (Fig 4I-4M). Collectively, our data  
313 indicate that the Cxcr4a-ERK1/2 cascade functions in DFC proliferation through  
314 regulation of Cyclin D1 expression during zebrafish L-R development.

315

### 316 **CDK4 and its kinase activity is required for Foxj1 protein stabilization**

317 Because the injection of *cyclin D1* mRNA into DFCs was found to rescue the L-R  
318 defects in *cxcr4a<sup>um20</sup>* mutants (Fig 4L and 4M), we hypothesized that Cyclin D1 acts  
319 downstream of Cxcr4a signaling to control both cell proliferation and cilia formation.  
320 In support of this hypothesis, upon injection of 300 pg *cyclin D1* mRNA into  
321 mid-blastula stage *cxcr4a<sup>um20</sup>* embryos, we observed that both the number and the  
322 length of KV cilia were restored (Fig 5A-5C), indicating a role of Cyclin D1 in  
323 ciliogenesis. It is surprising that the DFC-specific delivery of *cyclin D1* mRNA was  
324 also able to restore the expression of endogenous Foxj1a protein in *cxcr4a<sup>um20</sup>*  
325 embryos (Fig 5D).

326 We next aimed to understand whether Foxj1 protein stability is regulated by  
327 Cyclin D1-CDK4/6 complexes. As depicted in Fig 5E, Cyclin D1 or CDK4  
328 overexpression in HEK293T cells notably increased zFoxj1a expression. This  
329 increase in exogenously expressed zFoxj1a was even more apparent when Cyclin  
330 D1-CDK4 complexes were ectopically expressed (Fig 5E). We noted that Cyclin

331 D1-CDK4 complexes also showed similar effects on the expression levels of mouse  
332 Foxj1 (mFoxj1) (Fig 5F). In combination with our observation of unchanged *foxj1a*  
333 transcript expression in *cxcr4a<sup>um20</sup>* mutants, these results suggest that Cyclin  
334 D1-CDK4 complexes may play crucial roles in the prevention of Foxj1a protein  
335 degradation. Indeed, we observed that the treatment of MG132, a proteasome  
336 inhibitor, but not NH<sub>4</sub>Cl, a lysosome inhibitor, or 3-methyladenine (3-MA), a  
337 well-characterized inhibitor of autophagy, dramatically stabilized zFoxj1a protein (Fig  
338 5G). In contrast, blocking endogenous CDK activity with PD0332991 treatment was  
339 found to result in a clear reduction of zFoxj1a expression (Fig 5H). In addition, the  
340 PD0332991 treatment-induced zFoxj1a turnover was completely suppressed by  
341 co-treatment with MG132 (Fig 5H). Therefore, Cyclin D1-CDK4 complexes  
342 contribute to Foxj1 protein stabilization. To further determine whether CDK4 kinase  
343 activity is important for Foxj1 protein stability, we generated a zebrafish kinase  
344 deficient mutant denoted CDK4-K38M, in which the ATP-binding site (Lys-38) in the  
345 catalytic subunit was mutated to a methionine residue [48]. As shown in Fig 5I,  
346 ectopic expression of CDK4-K38M had no effect on the zFoxj1a expression and  
347 PD0332991 treatment eliminated CDK4-mediated protein stabilization. These data  
348 suggest that CDK4 stabilizes Foxj1 through its kinase activity.

349

### 350 **CDK4 physically interacts with and directly phosphorylates Foxj1**

351 To understand whether Foxj1 is a substrate of CDK4 kinase, we first examined  
352 the possible interaction between these two proteins. HeLa cells were transiently



353 transfected with Flag-tagged zFoxj1a and Myc-tagged CDK4. Immunofluorescence  
354 staining experiments revealed a colocalization of overexpressed zFoxj1a and CDK4 in  
355 the nuclear aggregates (Fig 6A), suggesting a potential interaction between these two  
356 proteins. As zFox1a was observed to be localized exclusively to the nucleus, even  
357 when co-expressed with CDK4 (Fig 6A), we excluded the effects of CDK4 on the  
358 subcellular distribution of zFox1a. We next examined the association between zFoxj1  
359 and CDK4 in wild-type embryos and HEK293T cells. Co-immunoprecipitation  
360 experiments demonstrated that overexpressed CDK4 interacted with endogenous and  
361 ectopically expressed zFoxj1a (Fig 6B and 6C). Interestingly, the kinase deficient  
362 form of CDK4 failed to associate with zFoxj1a (Fig 6C). In order to test whether  
363 CDK4 interacts directly with Foxj1 protein, we carried out an *in vitro* binding assay  
364 using purified proteins. As depicted in Fig 6D, Myc-CDK4 protein purified from  
365 bacterial cells was able to bind to GST-zFoxj1a but not GST proteins. Collectively,  
366 these results demonstrate that CDK4 interacts directly with zFoxj1a protein.

367 It is well established that the CDK families of serine/threonine protein kinases  
368 phosphorylate substrates containing the consensus amino acid sequence (S/T)PXR/K  
369 [49]. Because Cyclin D1-CDK4 complexes contribute to the stabilization of both  
370 mouse and zebrafish Foxj1 (Fig 5E and 5F), we hypothesized that CDK4 is involved  
371 in the phosphorylation of Foxj1 within conserved classic substrate motifs.  
372 Interestingly, we found that zFoxj1a contains a potential CDK phosphorylation motif  
373 “TPGK” at the N-terminal region, which is highly conserved in vertebrates (Fig 6E).  
374 To investigate whether CDK4 phosphorylates Foxj1 protein, a

375 phospho-threonine-proline antibody was used to enrich CDK substrates from whole  
376 cell lysates, and the presence of phosphorylated Foxj1 was examined by western blot.  
377 With these experiments, we found that CDK4 or Cyclin D1-CDK4 complexes could  
378 effectively phosphorylate zFoxj1a and mFoxj1 (Fig 6F and S5A). As expected,  
379 CDK4-K38M almost lost the ability to induce zFoxj1a phosphorylation (Fig 6F).  
380 These results clearly indicate that Foxj1 can be phosphorylated by CDK4.

381 We then aimed to determine whether the threonine 102 residue (T102) within the  
382 putative conserved substrate motif of zFoxj1a is a major CDK phosphorylation site.  
383 Excitingly, we observed that Cyclin D1-CDK4 complexes significantly promoted  
384 wild-type zFoxj1a phosphorylation, which was nearly abolished in T102 mutant, an  
385 unphosphorylated form of zFoxj1a (Fig 6G). Similarly, *in vitro* phosphorylation  
386 assays showed that purified CDK4 or Cyclin D1-CDK4 complexes resulted in distinct  
387 phosphorylation events when incubated with recombinant wild-type zFoxj1a protein,  
388 but not T102 mutant (Fig 6H). In addition, we observed an increased expression of  
389 wild-type zFoxj1a while not its T102 mutant in HEK293T cells upon co-expression  
390 with CDK4 (Fig 6I). Similarly, CDK4 was able to control mFoxj1 stabilization  
391 through phosphorylation of the T87 residue, located in the conserved substrate motif  
392 (S5B-S5C Fig). Taken together, we showed that CDK4 directly phosphorylates Foxj1  
393 to suppress its degradation.

394

395 **zFoxj1a undergoes Ubiquitin-independent proteasomal degradation via a direct**  
396 **interaction with Psmd4b**

397 Previous studies have suggested a primary role of the ubiquitin-proteasome  
398 system in the elimination of abnormal proteins and selective destruction of regulatory  
399 proteins [50,51]. To explore whether ubiquitination is required for Foxj1 degradation,  
400 we examined the effect of Ub K48R/G76A overexpression on zFoxj1a degradation. If  
401 zFoxj1a degradation was determined to be ubiquitylation-dependent, we would expect  
402 zFoxj1a to be stabilized upon overexpression of Ub K48R/G76A, which serves as a  
403 dominant negative inhibitor of poly-Ub chain formation [52,53]. Indeed, the presence  
404 of Ub K48R/G76A but not wild-type Ub efficiently inhibited the turnover of  $\beta$ -catenin  
405 (S6A Fig), which would be phosphorylated by glycogen synthase kinase-3 $\beta$  and  
406 destined for ubiquitin-mediated degradation [54]. Unexpectedly, overexpression of Ub  
407 K48R/G76A was unable to promote the stabilization of Flag-tagged zFoxj1a (S6A  
408 Fig). Because the Flag epitope contains two lysine residues, we generated a  
409 lysine-free version of zFoxj1a, termed HA-zFoxj1a-K20R by replacing the Flag tag  
410 with the HA epitope and mutating all 20 lysine residues within zFoxj1a protein to  
411 arginine residues. We found that both the wild-type and lysine-less zFoxj1a were  
412 significantly stabilized with CDK4 overexpression (S6B Fig). Therefore, zFoxj1a is  
413 able to be degraded independently of ubiquitylation.

414 Increasing evidence suggests that a list of proteins which directly interact with  
415 proteasomal subunits are thought to be degraded through an ubiquitin-independent  
416 degradation mechanism [55]. It has been demonstrated that the 19S regulatory subunit  
417 Rpn10 plays a critical role in the recognition of ubiquitin-independent substrates  
418 [56-58]. Therefore, we examined whether zFoxj1a binds to zebrafish Psmd4b, the

419 ortholog of mammalian Rpn10. Indeed, overexpressed or endogenous zFoxj1a was  
420 found to interact with Psm4b (Fig 7A and 7B). Consistent with these observations,  
421 an *in vitro* binding assay revealed a direct binding between purified zFoxj1a and  
422 Psm4b (Fig 7C).

423 To further unveil how CDK4 and its kinase activity regulate Foxj1 stabilization,  
424 we examined whether CDK4 functions to control the interaction between Psm4b and  
425 zFoxj1a. As expected, ectopic expression of wild-type CDK4, but not its kinase  
426 deficient mutant, dramatically suppressed the association of Psm4b with zFoxj1a or  
427 zFoxj1a-K20R (Fig 7D and 7E). In contrast, the binding ability of the  
428 unphosphorylated form of zFoxj1a for Psm4b was retained with CDK4  
429 co-expression (Fig 7F). Interestingly, the phospho-mimicking mutant of zFoxj1a  
430 (zFoxj1a-T102D) completely lost its ability to bind Psm4b (Fig 7G), suggesting that  
431 CDK4-mediated phosphorylation of zFoxj1a at T102 eliminates its affinity for  
432 Psm4b. In addition, Psm4b overexpression reduced the expression levels of  
433 zFoxj1a and its lysine-free mutant (Fig 7H). When HEK293T cells were transfected  
434 with same amount of plasmid DNA to express wild-type zFoxj1a and its T102A and  
435 T102D mutants, respectively, we detected the highest expression level of  
436 zFoxj1a-T102D (Fig 7I). However, T102D mutant could not be further stabilized by  
437 CDK4 overexpression (Fig 7I). Taken together, these results indicate that CDK4  
438 phosphorylates and stabilizes zFoxj1a by disrupting its association with Psm4b.

439 We next addressed the developmental relevance of CDK4-induced zFoxj1a  
440 stabilization. *Cxcr4a-deficient* DFCs exhibited defective *cycling D1* expression and

441 impaired G1/S transition (Fig 3E-3H and 4F), implying a dysregulated activation of  
442 the CDK4/6 kinases. DFC-specific overexpression of zFoxj1a-T102D, but not  
443 wild-type or zFoxj1a-T102A, was found to restore the length of KV cilia in  
444 *cxcr4a<sup>um20</sup>* mutants (Fig 7J and 7K). As zFoxj1a is not involved in DFC proliferation  
445 [19,20], it was reasonable to find that the decrease in the number of cilia was not  
446 alleviated (S7 Fig). Overall, our results support a model in which Cxcl12b/Cxcr4a  
447 signaling activates ERK1/2, which then promotes Cyclin D1 expression. This in turn  
448 activates CDK4/6 kinase activity in DFCs. These activated G1 CDKs drive G1/S  
449 transition during DFC proliferation and promote zFoxj1a stability by phosphorylation  
450 to support KV ciliogenesis at later stages (Fig 7L).

451

## 452 **Discussion**

453 In zebrafish embryos, DFCs undergo mitotic proliferation during epiboly and then  
454 exit the cell cycle, giving rise to epithelial cells that assemble cilia in the mature KV  
455 organ [16]. Cell cycle defects in DFCs are often accompanied by an alteration in KV  
456 cilia elongation, raising the issue of whether there exists a feasible link between the  
457 cell cycle and cilia formation [16]. In this study, our experiments resolve this issue by  
458 demonstrating that Cxcr4 signaling is required for DFC proliferation and KV  
459 ciliogenesis by promoting Cyclin D1 expression. Specifically, we found that Cyclin  
460 D1-CDK4/6 accelerates the G1/S transition in DFCs, while also facilitates cilia  
461 formation via stabilization of zFoxj1a. Ciliary dynamics appear to be precisely  
462 coordinated with cell cycle progression [59]. It has been suggested previously that cell

463 quiescence is essential for the formation of mouse nodal cilia [60]. Indeed, we  
464 observed that proliferating DFCs enter into a quiescent state upon differentiation into  
465 ciliated epithelial KV cells. Interestingly, our data indicates that during epiboly stages,  
466 Cxcr4a signal-induced expression of Cyclin D1 functions to regulate DFC  
467 proliferation and zFoxj1a stability, which is important for the ciliogenesis of quiescent  
468 KV cells. Therefore, the rapid cell cycle progression of DFCs during epiboly stages is  
469 not only required for the generation of enough cells to construct KV, but also plays a  
470 critical role in reserving sufficient levels of zFoxj1a protein to support subsequent  
471 cilia formation. Because Wnt/ $\beta$ -catenin signaling has been reported to play a role in  
472 both DFC proliferation and KV cilia elongation [21,61], it is interesting to consider  
473 whether this signaling pathway contributes to zFoxj1a stabilization via regulation of  
474 cell cycle progression during the establishment of L-R asymmetry.

475 It has been reported previously that G1 cyclins function together with their  
476 associated CDKs to phosphorylate a variety of transcription factors, including  
477 Smad2/3 and pluripotency factors, to control embryonic stem (ES) cell differentiation  
478 [11,12]. A systematic screen for CDK4/6 substrates identified fox family transcription  
479 factor FOXM1 as a critical phosphorylation target [62]. CDK4/6 stabilize and activate  
480 FOXM1 by phosphorylation at multiple sites to protect cancer cells from senescence  
481 [62]. In contrast, CDK2 reduces DNA damage-induced cell death by phosphorylation  
482 of FOXO1 at Ser249, resulting in cytoplasmic localization of FOXO1 [63]. In this  
483 study, we show that CDK4 directly interacts with and phosphorylates zFoxj1a at a  
484 conserved “TPGK” motif within the N-terminal region. Phosphorylation at T102 was

485 not found to alter the subcellular distribution of zFoxj1a, but was shown to promote  
486 its stabilization. Therefore, the functional interaction between CDK4 and zFoxj1a  
487 provides a mechanism by which cilia development is facilitated. Because CDK4 also  
488 stabilizes mFoxj1 through phosphorylation of T87 within the substrate motif, it is  
489 likely that the molecular linkage between cell-cycle progression and ciliogenesis is  
490 conserved among vertebrates.

491 The majority of proteasomal protein degradation relies on Ub conjugation.  
492 However, there are increasing numbers of examples of proteasomal degradation  
493 which occur without prior ubiquitination [64,65]. Our study reveals that  
494 overexpression of the dominant-negative Ub has no effect on zFoxj1a stabilization.  
495 However, wild-type and lysine-less zFoxj1a are found to be similarly stabilized by  
496 ectopic CDK4 expression. Therefore, zFoxj1a is targeted for proteasomal degradation  
497 in an Ub-independent manner. Intriguingly, E3 Ub ligases, including MGRN1 and  
498 Lnx2b, have been reported to play a role in L-R laterality specification in rodents and  
499 zebrafish [23,66], suggesting a role of the Ub-proteasome system in the modulation of  
500 protein turnover during L-R body patterning. However, due to the fact that L-R  
501 symmetry breaking occurs within a short time window during vertebrate embryonic  
502 development [4,67], the accelerated and economical regulation of protein degradation  
503 may be essential. Because Ub-independent degradation does not require the  
504 enzymatic cascade of Ub-conjugation, it would be more efficient to alter the  
505 concentration of zFoxj1a protein levels via Ub-independent proteasomal degradation  
506 during L-R asymmetric development. Interestingly, a recent study has demonstrated

507 that Foxj1 is rapidly turned over by the Ub-proteasome system in mouse primary  
508 ependymal cells [68]. Therefore, Foxj1 is a protein with a short half-life which  
509 undergoes proteasomal degradation via Ub-dependent or -independent pathways  
510 dependent on the cellular context.

511 Several proteins have been reported to interact with the 19S regulatory subunit  
512 Rpn10 via their Ub-like (UBL) domains [56-58]. Interestingly, while lacking a  
513 UBL-domain, zFoxj1a interacts directly with Psm4b, the zebrafish ortholog of  
514 mammalian Rpn10. Our study demonstrates that CDK4 phosphorylates and stabilizes  
515 zFoxj1a by disrupting its association with Psm4b. Similarly, the Ub-independent  
516 proteasomal degradation of Yeast Pah1 has also shown to be governed by its  
517 phosphorylation state [69]. Therefore, this may represent a general mechanism by  
518 which protein kinase-mediated phosphorylation plays a critical role in the protection  
519 of their substrates from Ub-independent proteasomal degradation.

520

## 521 **Materials and methods**

### 522 **Zebrafish strains**

523 Wild-type embryos were obtained from natural matings of Tuebingen zebrafish.  
524 Embryos were raised in Holtfreter's solution at 28.5 °C and staged by morphology.  
525 *cxcr4a* mutant embryos were generated by crossing homozygous male and female  
526 *cxcr4a<sup>mu20</sup>* adult mutants. *Tg(sox17:GFP)* transgenic embryos were used to indicate  
527 the DFCs and KV cells during L-R asymmetric development.  
528 *Tg(EF1a:mKO2-zCdt1(1/190))* transgenic embryos express the fluorescent fusion



529 protein mKO2-zCdt1(1/190) in cells at the G1 phase during embryonic development.  
530 *Tg(flk:EGFP)* transgenic embryos express EGFP in blood vessels. Our zebrafish  
531 experiments were all approved and carried out in accordance with the Animal Care  
532 Committee at the Institute of Zoology, Chinese Academy of Sciences (Permission  
533 Number: IOZ-13048).

534

### 535 **RNA synthesis, morpholinos and microinjection**

536 Capped mRNAs for *cxcr4a*, *caMEK1*, *cyclin D1*, *zfoxj1a*, *zfoxj1a-T102A* and  
537 *zfoxj1a-T102D* were *in vitro* synthesized from corresponding linearized plasmids  
538 using the mMessage mMachine kit (Ambion). Digoxigenin-UTP-labeled antisense  
539 RNA probes were *in vitro* transcribed using the MEGAscript Kit (Ambion) according  
540 to the manufacturer's instructions. The standard control morpholino  
541 (5'-CCTCTTACCTCAGTTACAATTTATA-3') and splicing MO targeting *cxcr4a*  
542 (5'-AGACGATGTGTTTCGTAATAAGCCAT-3') were purchased from Gene Tools  
543 (Philomath, OR, USA) and used as previously described [30,70]. For DFC-specific  
544 knockdown or overexpression experiments, indicated MOs or mRNAs were injected  
545 into the yolk at the 256-cell stage as described previously [36].

546

### 547 **Whole-Mount in situ hybridization**

548 Whole-mount *in situ* hybridization was performed using the NBT-BCIP substrate  
549 following standard procedures. For two-color fluorescence *in situ* hybridization,  
550 Anti-digoxigenin-POD (11633716001, Roche) and anti-fluorescein-POD

551 (11426346910, Roche) were used as primary antibodies to detect digoxigenin-labeled  
552 sox17 probes and fluorescein-labeled *cyclin D1* probes, respectively. Fluorescence *in*  
553 *situ* hybridization was then carried out using the Perkin Elmer TAS fluorescein system  
554 (NEL701A001KT) according to the manufacturer's instructions.

555

### 556 **Cell lines and transfection**

557 HEK293T and Hela cell lines (American Tissue Culture Collection, ATCC, USA)  
558 were cultured in DMEM medium supplemented with 10% FBS in a 37°C humidified  
559 incubator in a 5% CO<sub>2</sub> environment. Cell transfections were carried out using  
560 Lipofectamine 2000 (11668019, Invitrogen) following the manufacturer's  
561 instructions.

562

### 563 **Immunostaining and confocal microscope**

564 Embryos were fixed in 4% paraformaldehyde overnight. Fixed embryos were then  
565 rinsed with PBST for a total of 4 times every 5 minutes. Embryos were then blocked  
566 at room temperature for 1 hour in 10% heat-inactivated goat serum and then stained  
567 with the following affinity-purified primary antibodies overnight at 4°C:  
568 anti-β-Catenin antibody (1:500; ab6302, Abcam), anti-Cdh1 (1:200; GTX125890,  
569 GeneTex), anti-pERK1/2 (1:1000; 9101, Cell Signaling), anti-acetylated-Tubulin  
570 antibody (1:400; T6793, Sigma), anti-BrdU (1: 1000; ab6326, Abcam), anti-α-PKC  
571 (1:200, sc-216, Santa Cruz), anti-GFP (1:1000; A-11122, Invitrogen), anti-GFP  
572 (1:1000; A-11120, Invitrogen), anti-Foxj1 (1:200; ab220028, abcam). Samples were

573 then washed three times with PBST, followed by incubation with secondary  
574 antibodies, including DyLight 488-conjugated Goat anti-rabbit IgG (1:200;  
575 711-545-152, Jackson), DyLight 594-conjugated Goat anti-mouse IgG (1:200;  
576 715-585-150, Jackson), DyLight 488-conjugated AffiniPure goat anti-mouse IgG  
577 (1:200; 715-545-150, Jackson) and DyLight 594-conjugated AffiniPure goat  
578 anti-rabbit IgG (1:200; 711-585-152, Jackson) for 1 hour at room temperature. In  
579 some experiments, DAPI (1:10000, Sigma) was used to stain nuclei. The stained  
580 embryos were then embedded with 2% low melting agarose and imaged using a  
581 Nikon A1R+ confocal microscope with identical settings.

582

### 583 **Pharmacological treatment**

584 To block CDK activity, embryos were treated with 0.5  $\mu$ M PD0332991 (A8318,  
585 Palbociclib) or 0.2  $\mu$ M CY202 (A1723, Palbociclib) from the shield stage to the bud  
586 stage. For CDK4/6 inhibition in cultured cells, HEK293T cells were treated with 0.5  
587  $\mu$ M PD0332991 for 5 hours prior to harvest. In order to examine which pathway is  
588 required for zFoxj1a degradation, HEK293T cells were transfected with plasmids  
589 expressing Flag-zFoxj1a and treated with 20 mM  $\text{NH}_4\text{Cl}$  (A116363, Aladdin), 20  $\mu$ M  
590 MG132 (M7449, Sigma) and 5 mM 3-MA (M9281, Sigma), respectively, for 5 hours  
591 prior to harvest.

592

### 593 **Fluorescent beads tracking**

594 Fluorescent red beads of 1  $\mu$ m diameter (1:500, 18660-5, Polysciences) were injected

595 into the KV of embryos at the 6-somite stage. The resulting embryos were then  
596 embedded in 2% low melting agarose at the 10-somite stage for confocal imaging.  
597 Beads tracking videos and images were processed using Image Pro 6.0.

598

### 599 **Antibodies and immunoprecipitation assays**

600 For immunoblotting experiments, we used the following affinity-purified antibodies:  
601 Anti-Flag (1:5000; F2555, Sigma), anti-Myc (1:3000; M047-3, MBL), anti-HA  
602 (1:3000; CW0092A, CW), anti- $\beta$ -Tubulin (1:5000, CW0098M, CWBIO), and  
603 anti-Foxj1 (1:200; ab220028, Abcam).

604 For coimmunoprecipitation assays, embryos or HEK293T cells were harvested  
605 and lysed with TNE lysis buffer (10mM Tris-HCl, pH 7.5, 150 mM NaCl, 2 mM  
606 EDTA, and 0.5% Nonidet P-40) containing a protease inhibitor mixture. Lysates were  
607 incubated with anti-Flag-agarose beads (A2220, Sigma) or protein A-Sepharose beads  
608 (101041, Invitrogen) and anti-phospho-Threonine-Proline antibody (1:5000; 9391,  
609 Cell Signaling) at 4°C for 4 hours. Beads were washed four times with TNE buffer.  
610 Bound proteins were then separated by SDS-PAGE and visualized by western blots.

611

### 612 **In vitro GST Pull-Down**

613 GST fusion proteins were expressed in Escherichia coli. strain BL21 and purified  
614 using Glutathione-Sepharose 4B beads (71024800-GE, GE Healthcare).  
615 GST-Myc-CDK4, GST-HA-cyclinD1, and GST-Flag-psmd4b were treated with  
616 Thrombin (1:1000; T4648, Sigma) to cleave their GST tags. For *in vitro* binding

617 assays, GST-Foxj1a proteins were immobilized by Glutathione-Sepharose 4B beads  
618 and incubated with the indicated purified proteins at 4°C for 3 hours. Following  
619 washing, the bound proteins were separated with SDS-PAGE and analyzed by western  
620 blots.

621

### 622 **In vitro kinase assay**

623 For *in vitro* kinase assays, 1 µg GST-Foxj1a or GST-Foxj1a-T102A was incubated  
624 with 1 µg of the indicated purified proteins in 1×kinase buffer (25 mM Tris-Cl, pH7.5,  
625 5 mM β-glycerophosphate, 0.1 mM Na<sub>3</sub>VO<sub>4</sub>, 10 mM MgCl<sub>2</sub>, 2 mM dithiothreitol)  
626 with or without 50 µM ATP (P0756S, New England Biolabs) at 30°C for 30 min. The  
627 mixture was then separated on 10% SDS-PAGE and visualized by western blots or  
628 Coomassie Blue staining.

629

### 630 **Statistical analysis**

631 Cilia number and length were measured using ImageJ software. All results were  
632 expressed as the mean ± SD. Differences between control and treated groups were  
633 analyzed using the unpaired two-tailed Student's *t*-test. Results were considered  
634 statistically significant at  $p < 0.05$ .

635

### 636 **Acknowledgements**

637 We are grateful to Dr. Jingwei Xiong (Peking University, China) for the  
638 *Tg(EF1a:mKO2-zCdt1(1/190))* fish line and Dr. Linfei Luo (Southwest University,

639 China) for *cxcr4a<sup>mu20</sup>* and *cxcl12b<sup>mu100</sup>* fish lines.

640

641 **References**

642 1. Grimes DT, Burdine RD (2017) Left-Right Patterning: Breaking Symmetry to  
643 Asymmetric Morphogenesis. *Trends Genet* 33: 616-628.

644 2. Essner JJ, Amack JD, Nyholm MK, Harris EB, Yost HJ (2005) Kupffer's vesicle is  
645 a ciliated organ of asymmetry in the zebrafish embryo that initiates left-right  
646 development of the brain, heart and gut. *Development* 132: 1247-1260.

647 3. Hirokawa N, Tanaka Y, Okada Y, Takeda S (2006) Nodal flow and the generation  
648 of left-right asymmetry. *Cell* 125: 33-45.

649 4. Matsui T, Bessho Y (2012) Left-right asymmetry in zebrafish. *Cell Mol Life Sci* 69:  
650 3069-3077.

651 5. Maclean K, Dunwoodie SL (2004) Breaking symmetry: a clinical overview of  
652 left-right patterning. *Clin Genet* 65: 441-457.

653 6. Ramsdell AF (2005) Left-right asymmetry and congenital cardiac defects: getting  
654 to the heart of the matter in vertebrate left-right axis determination. *Dev Biol*  
655 288: 1-20.

656 7. Sherr CJ, Roberts JM (1999) CDK inhibitors: positive and negative regulators of  
657 G1-phase progression. *Genes Dev* 13: 1501-1512.

658 8. Dalton S (2015) Linking the Cell Cycle to Cell Fate Decisions. *Trends Cell Biol* 25:  
659 592-600.

660 9. Dalton S (2013) G1 compartmentalization and cell fate coordination. *Cell* 155:

- 661 13-14.
- 662 10. Julian LM, Carpenedo RL, Rothberg JL, Stanford WL (2016) Formula G1: Cell  
663 cycle in the driver's seat of stem cell fate determination. *Bioessays* 38:  
664 325-332.
- 665 11. Pauklin S, Vallier L (2013) The cell-cycle state of stem cells determines cell fate  
666 propensity. *Cell* 155: 135-147.
- 667 12. Liu L, Michowski W, Inuzuka H, Shimizu K, Nihira NT, et al. (2017) G1 cyclins  
668 link proliferation, pluripotency and differentiation of embryonic stem cells.  
669 *Nat Cell Biol* 19: 177-188.
- 670 13. Lange C, Huttner WB, Calegari F (2009) Cdk4/cyclinD1 overexpression in neural  
671 stem cells shortens G1, delays neurogenesis, and promotes the generation and  
672 expansion of basal progenitors. *Cell Stem Cell* 5: 320-331.
- 673 14. Cooper MS, D'Amico LA (1996) A cluster of noninvoluting endocytic cells at the  
674 margin of the zebrafish blastoderm marks the site of embryonic shield  
675 formation. *Dev Biol* 180: 184-198.
- 676 15. Oteiza P, Koppen M, Concha ML, Heisenberg CP (2008) Origin and shaping of  
677 the laterality organ in zebrafish. *Development* 135: 2807-2813.
- 678 16. Gokey JJ, Dasgupta A, Amack JD (2015) The V-ATPase accessory protein  
679 Atp6ap1b mediates dorsal forerunner cell proliferation and left-right  
680 asymmetry in zebrafish. *Dev Biol* 407: 115-130.
- 681 17. Brody SL, Yan XH, Wuerffel MK, Song SK, Shapiro SD (2000) Ciliogenesis and  
682 left-right axis defects in forkhead factor HFH-4-null mice. *Am J Respir Cell*

- 683 Mol Biol 23: 45-51.
- 684 18. Chen J, Knowles HJ, Hebert JL, Hackett BP (1998) Mutation of the mouse  
685 hepatocyte nuclear factor/forkhead homologue 4 gene results in an absence of  
686 cilia and random left-right asymmetry. *J Clin Invest* 102: 1077-1082.
- 687 19. Yu X, Ng CP, Habacher H, Roy S (2008) Foxj1 transcription factors are master  
688 regulators of the motile ciliogenic program. *Nat Genet* 40: 1445-1453.
- 689 20. Stubbs JL, Oishi I, Izpisua Belmonte JC, Kintner C (2008) The forkhead protein  
690 Foxj1 specifies node-like cilia in *Xenopus* and zebrafish embryos. *Nat Genet*  
691 40: 1454-1460.
- 692 21. Caron A, Xu X, Lin X (2012) Wnt/beta-catenin signaling directly regulates Foxj1  
693 expression and ciliogenesis in zebrafish Kupffer's vesicle. *Development* 139:  
694 514-524.
- 695 22. Neugebauer JM, Amack JD, Peterson AG, Bisgrove BW, Yost HJ (2009) FGF  
696 signalling during embryo development regulates cilia length in diverse  
697 epithelia. *Nature* 458: 651-654.
- 698 23. Kim MJ, Rhee M, Ro H (2014) Lnx2b, an E3 ubiquitin ligase, in dorsal forerunner  
699 cells and Kupffer's vesicle is required for specification of zebrafish left-right  
700 laterality. *Animal Cells and Systems* 18: 333-339.
- 701 24. Raz E, Mahabaleshwar H (2009) Chemokine signaling in embryonic cell  
702 migration: a fisheye view. *Development* 136: 1223-1229.
- 703 25. Boldajipour B, Doitsidou M, Tarbashevich K, Laguri C, Yu SR, et al. (2011)  
704 Cxcl12 evolution--subfunctionalization of a ligand through altered interaction



- 705 with the chemokine receptor. *Development* 138: 2909-2914.
- 706 26. Peled A, Petit I, Kollet O, Magid M, Ponomaryov T, et al. (1999) Dependence of  
707 human stem cell engraftment and repopulation of NOD/SCID mice on CXCR4.  
708 *Science* 283: 845-848.
- 709 27. Doitsidou M, Reichman-Fried M, Stebler J, Kopranner M, Dorries J, et al. (2002)  
710 Guidance of primordial germ cell migration by the chemokine SDF-1. *Cell*  
711 111: 647-659.
- 712 28. David NB, Sapede D, Saint-Etienne L, Thisse C, Thisse B, et al. (2002) Molecular  
713 basis of cell migration in the fish lateral line: role of the chemokine receptor  
714 CXCR4 and of its ligand, SDF1. *Proc Natl Acad Sci U S A* 99: 16297-16302.
- 715 29. Knaut H, Werz C, Geisler R, Nusslein-Volhard C, Tubingen Screen C (2003) A  
716 zebrafish homologue of the chemokine receptor Cxcr4 is a germ-cell guidance  
717 receptor. *Nature* 421: 279-282.
- 718 30. Nair S, Schilling TF (2008) Chemokine signaling controls endodermal migration  
719 during zebrafish gastrulation. *Science* 322: 89-92.
- 720 31. Olesnick Killian EC, Birkholz DA, Artinger KB (2009) A role for chemokine  
721 signaling in neural crest cell migration and craniofacial development. *Dev*  
722 *Biol* 333: 161-172.
- 723 32. Li L, Mao A, Wang P, Ning G, Cao Y, et al. (2018) Endodermal pouch-expressed  
724 *dmrt2b* is important for pharyngeal cartilage formation. *Biol Open* 7.
- 725 33. Siekmann AF, Standley C, Fogarty KE, Wolfe SA, Lawson ND (2009)  
726 Chemokine signaling guides regional patterning of the first embryonic artery.

- 727 Genes Dev 23: 2272-2277.
- 728 34. Chong SW, Emelyanov A, Gong Z, Korzh V (2001) Expression pattern of two  
729 zebrafish genes, *cxcr4a* and *cxcr4b*. Mech Dev 109: 347-354.
- 730 35. Roussigne M, Bianco IH, Wilson SW, Blader P (2009) Nodal signalling imposes  
731 left-right asymmetry upon neurogenesis in the habenular nuclei. Development  
732 136: 1549-1557.
- 733 36. Amack JD, Yost HJ (2004) The T box transcription factor no tail in ciliated cells  
734 controls zebrafish left-right asymmetry. Curr Biol 14: 685-690.
- 735 37. Bussmann J, Wolfe SA, Siekmann AF (2011) Arterial-venous network formation  
736 during brain vascularization involves hemodynamic regulation of chemokine  
737 signaling. Development 138: 1717-1726.
- 738 38. Hamada H, Meno C, Watanabe D, Saijoh Y (2002) Establishment of vertebrate  
739 left-right asymmetry. Nat Rev Genet 3: 103-113.
- 740 39. Aw S, Levin M (2009) Is left-right asymmetry a form of planar cell polarity?  
741 Development 136: 355-366.
- 742 40. Sugiyama M, Sakaue-Sawano A, Imura T, Fukami K, Kitaguchi T, et al. (2009)  
743 Illuminating cell-cycle progression in the developing zebrafish embryo. Proc  
744 Natl Acad Sci U S A 106: 20812-20817.
- 745 41. Klein S, Abraham M, Bulvik B, Dery E, Weiss ID, et al. (2018) CXCR4 Promotes  
746 Neuroblastoma Growth and Therapeutic Resistance through  
747 miR-15a/16-1-Mediated ERK and BCL2/Cyclin D1 Pathways. Cancer Res 78:  
748 1471-1483.

- 749 42. Mo W, Chen J, Patel A, Zhang L, Chau V, et al. (2013) CXCR4/CXCL12 mediate  
750 autocrine cell- cycle progression in NF1-associated malignant peripheral nerve  
751 sheath tumors. *Cell* 152: 1077-1090.
- 752 43. Wang Y, Xu P, Qiu L, Zhang M, Huang Y, et al. (2016) CXCR7 Participates in  
753 CXCL12-mediated Cell Cycle and Proliferation Regulation in Mouse Neural  
754 Progenitor Cells. *Curr Mol Med* 16: 738-746.
- 755 44. Bolcome RE, 3rd, Chan J (2010) Constitutive MEK1 activation rescues anthrax  
756 lethal toxin-induced vascular effects in vivo. *Infect Immun* 78: 5043-5053.
- 757 45. Sherr CJ (1995) D-type cyclins. *Trends Biochem Sci* 20: 187-190.
- 758 46. Fry DW, Harvey PJ, Keller PR, Elliott WL, Meade M, et al. (2004) Specific  
759 inhibition of cyclin-dependent kinase 4/6 by PD 0332991 and associated  
760 antitumor activity in human tumor xenografts. *Mol Cancer Ther* 3: 1427-1438.
- 761 47. De Azevedo WF, Leclerc S, Meijer L, Havlicek L, Strnad M, et al. (1997)  
762 Inhibition of cyclin-dependent kinases by purine analogues: crystal structure  
763 of human cdk2 complexed with roscovitine. *Eur J Biochem* 243: 518-526.
- 764 48. Matsushime H, Ewen ME, Strom DK, Kato JY, Hanks SK, et al. (1992)  
765 Identification and properties of an atypical catalytic subunit (p34PSK-J3/cdk4)  
766 for mammalian D type G1 cyclins. *Cell* 71: 323-334.
- 767 49. Songyang Z, Blechner S, Hoagland N, Hoekstra MF, Piwnica-Worms H, et al.  
768 (1994) Use of an oriented peptide library to determine the optimal substrates  
769 of protein kinases. *Curr Biol* 4: 973-982.
- 770 50. Ciechanover A, Stanhill A (2014) The complexity of recognition of ubiquitinated

- 771 substrates by the 26S proteasome. *Biochim Biophys Acta* 1843: 86-96.
- 772 51. Johnson BM, DeBose-Boyd RA (2018) Underlying mechanisms for  
773 sterol-induced ubiquitination and ER-associated degradation of HMG CoA  
774 reductase. *Semin Cell Dev Biol* 81: 121-128.
- 775 52. Finley D, Sadis S, Monia BP, Boucher P, Ecker DJ, et al. (1994) Inhibition of  
776 proteolysis and cell cycle progression in a multiubiquitination-deficient yeast  
777 mutant. *Mol Cell Biol* 14: 5501-5509.
- 778 53. Ju D, Xie Y (2004) Proteasomal degradation of RPN4 via two distinct  
779 mechanisms, ubiquitin-dependent and -independent. *J Biol Chem* 279:  
780 23851-23854.
- 781 54. Liu C, Li Y, Semenov M, Han C, Baeg GH, et al. (2002) Control of beta-catenin  
782 phosphorylation/degradation by a dual-kinase mechanism. *Cell* 108: 837-847.
- 783 55. Sanchez-Lanzas R, Castano JG (2014) Proteins directly interacting with  
784 mammalian 20S proteasomal subunits and ubiquitin-independent proteasomal  
785 degradation. *Biomolecules* 4: 1140-1154.
- 786 56. Hiyama H, Yokoi M, Masutani C, Sugasawa K, Maekawa T, et al. (1999)  
787 Interaction of hHR23 with S5a. The ubiquitin-like domain of hHR23 mediates  
788 interaction with S5a subunit of 26 S proteasome. *J Biol Chem* 274:  
789 28019-28025.
- 790 57. Sakata E, Yamaguchi Y, Kurimoto E, Kikuchi J, Yokoyama S, et al. (2003)  
791 Parkin binds the Rpn10 subunit of 26S proteasomes through its ubiquitin-like  
792 domain. *EMBO Rep* 4: 301-306.

- 793 58. Du J, Zhang J, He T, Li Y, Su Y, et al. (2016) Stuxnet Facilitates the Degradation  
794 of Polycomb Protein during Development. *Dev Cell* 37: 507-519.
- 795 59. Ford MJ, Yeyati PL, Mali GR, Keighren MA, Waddell SH, et al. (2018) A  
796 Cell/Cilia Cycle Biosensor for Single-Cell Kinetics Reveals Persistence of  
797 Cilia after G1/S Transition Is a General Property in Cells and Mice. *Dev Cell*  
798 47: 509-523 e505.
- 799 60. Komatsu Y, Kaartinen V, Mishina Y (2011) Cell cycle arrest in node cells  
800 governs ciliogenesis at the node to break left-right symmetry. *Development*  
801 138: 3915-3920.
- 802 61. Zhang M, Zhang J, Lin SC, Meng A (2012) beta-Catenin 1 and beta-catenin 2  
803 play similar and distinct roles in left-right asymmetric development of  
804 zebrafish embryos. *Development* 139: 2009-2019.
- 805 62. Anders L, Ke N, Hydbring P, Choi YJ, Widlund HR, et al. (2011) A systematic  
806 screen for CDK4/6 substrates links FOXM1 phosphorylation to senescence  
807 suppression in cancer cells. *Cancer Cell* 20: 620-634.
- 808 63. Huang H, Regan KM, Lou Z, Chen J, Tindall DJ (2006) CDK2-dependent  
809 phosphorylation of FOXO1 as an apoptotic response to DNA damage. *Science*  
810 314: 294-297.
- 811 64. Erales J, Coffino P (2014) Ubiquitin-independent proteasomal degradation.  
812 *Biochim Biophys Acta* 1843: 216-221.
- 813 65. Hwang J, Winkler L, Kalejta RF (2011) Ubiquitin-independent proteasomal  
814 degradation during oncogenic viral infections. *Biochim Biophys Acta* 1816:

- 815 147-157.
- 816 66. Cota CD, Bagher P, Pelc P, Smith CO, Bodner CR, et al. (2006) Mice with  
817 mutations in Mahogunin ring finger-1 (*Mgrn1*) exhibit abnormal patterning of  
818 the left-right axis. *Dev Dyn* 235: 3438-3447.
- 819 67. Yoshida S, Hamada H (2014) Roles of cilia, fluid flow, and Ca<sup>2+</sup> signaling in  
820 breaking of left-right symmetry. *Trends Genet* 30: 10-17.
- 821 68. Abdi K, Lai CH, Paez-Gonzalez P, Lay M, Pyun J, et al. (2018) Uncovering  
822 inherent cellular plasticity of multiciliated ependyma leading to ventricular  
823 wall transformation and hydrocephalus. *Nat Commun* 9: 1655.
- 824 69. Hsieh LS, Su WM, Han GS, Carman GM (2015) Phosphorylation regulates the  
825 ubiquitin-independent degradation of yeast Pah1 phosphatidate phosphatase  
826 by the 20S proteasome. *J Biol Chem* 290: 11467-11478.
- 827 70. Ning G, Liu X, Dai M, Meng A, Wang Q (2013) MicroRNA-92a upholds Bmp  
828 signaling by targeting *noggin3* during pharyngeal cartilage formation. *Dev*  
829 *Cell* 24: 283-295.
- 830
- 831
- 832
- 833
- 834
- 835
- 836

837 **Figures and Figure legends**

838 **Figure 1**

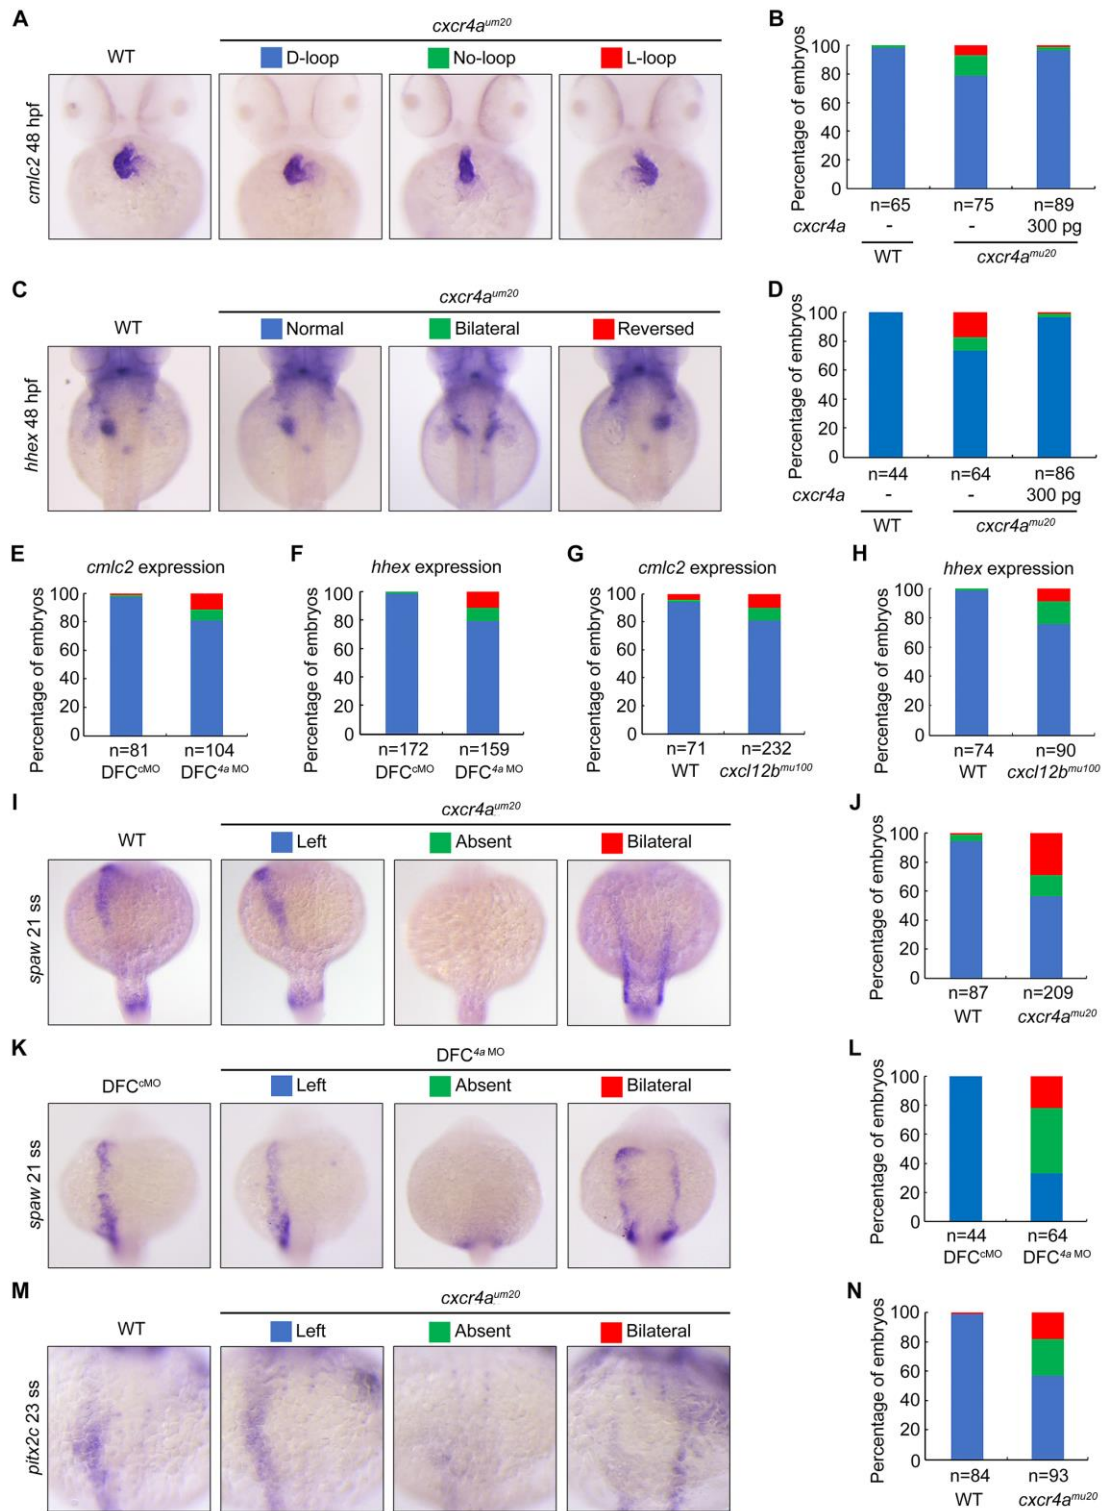

839

840

841

842 **Fig 1. Cxcl12b-Cxcr4a signaling axis is essential for L-R asymmetric**  
843 **development.** (A-D) Wild-type embryos and *cxcr4a*<sup>mu20</sup> mutants injected with or  
844 without 300 pg *cxcr4a* mRNA at the 256-cell stage were examined for cardiac looping  
845 and liver laterality at 48 hpf by WISH against *cmlc2* (a) and *hhex* (C). Embryos with  
846 different phenotypes were shown in ventral (A) or dorsal view (C). Statistical data  
847 were shown in (B) and (D). (E-H) Statistical data for the expression patterns of *cmlc2*  
848 and *hhex* at 48hpf in wild-type embryos injected with 8 ng *cxcr4a* MO (4a MO) at the  
849 256-cell stage (E and F) and *cxcl12b* mutants (G and H). (I-N) *cxcr4a* deficiency  
850 alters Nodal gene expression pattern. Representative images of *spaw* and *pitx2c*  
851 expression in *cxcr4a* mutants (I and M) and morphants (K). All embryos were shown  
852 in dorsal views with anterior on the top. Ratios of embryos were shown in (J, L and  
853 N).

854

855

856

857

858

859

860

861

862

863



864 Figure 2

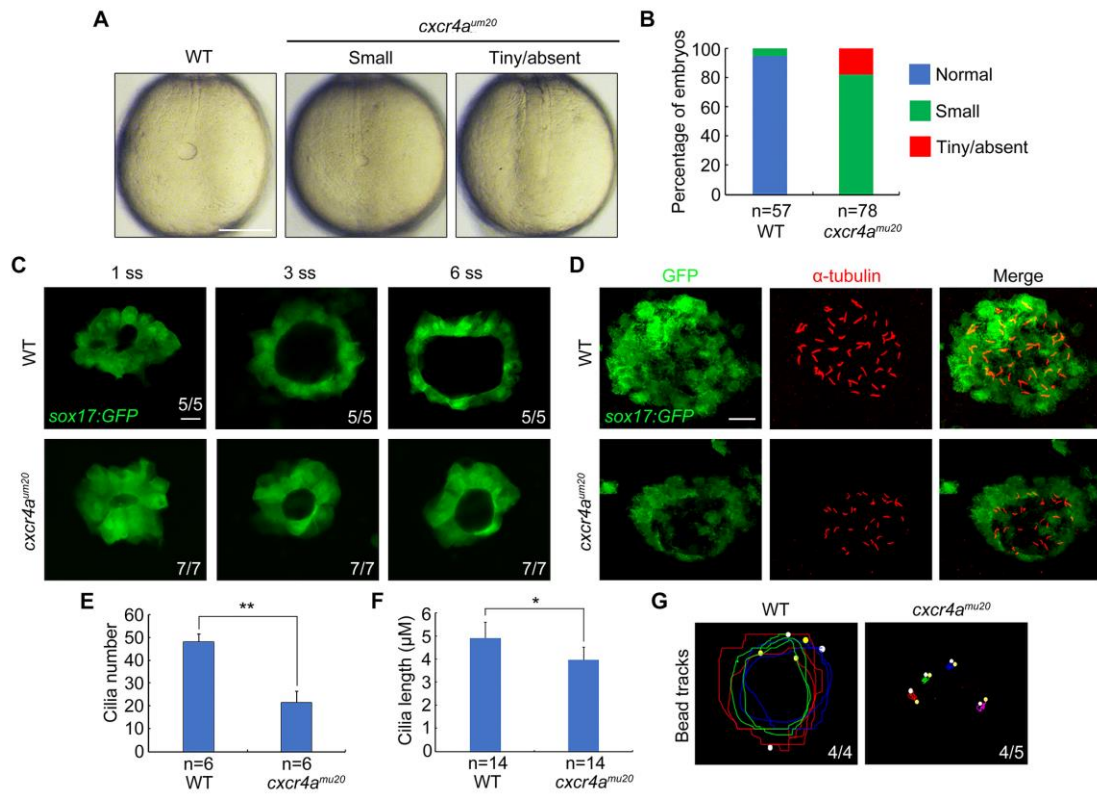

865

866

867

868

869

870

871

872

873

874

875

876

877 **Fig 2. *cxcr4a* is indispensable for KV formation and ciliogenesis.** (A-B) Light  
878 micrographs at the 10-somite stage showed smaller or even absent KVs in *cxcr4a<sup>mu20</sup>*  
879 mutants. Scale bar, 200  $\mu$ m. Embryo ratios with different KV sizes were shown in (B).  
880 (C) Time-lapse confocal images from the 1-somite stage to the 6-somite stage showed  
881 the dynamic formation of KV in wild-type and *cxcr4a* deficient *Tg(sox17:GFP)*  
882 embryos. Scale bar, 20  $\mu$ m. The ratios of affected embryos was indicated. (D-F)  
883 Fluorescent immunostaining of KV using anti-GFP and anti-acetylated Tubulin  
884 antibodies at the 10-somite stage in wild-type embryos and *cxcr4a<sup>mu20</sup>* mutants. Scale  
885 bar, 20  $\mu$ m. Cilia average number and length were quantified from three independent  
886 experiments and the group values were expressed as the mean  $\pm$  SD (E and F).  
887 Student's *t*-test, \* $P < 0.05$ , \*\* $p < 0.01$ . (G) Fluorescent bead tracking experiments  
888 showed that fluorescent beads moved in a persistent counter-clockwise fashion in  
889 wild-type embryos, but had no directional flow in *cxcr4a<sup>mu20</sup>* mutants. White spots,  
890 yellow spots, and curves mark the start points, the end points, and the tracks of bead  
891 movements, respectively.

892

893

894

895

896

897

898

899 Figure 3

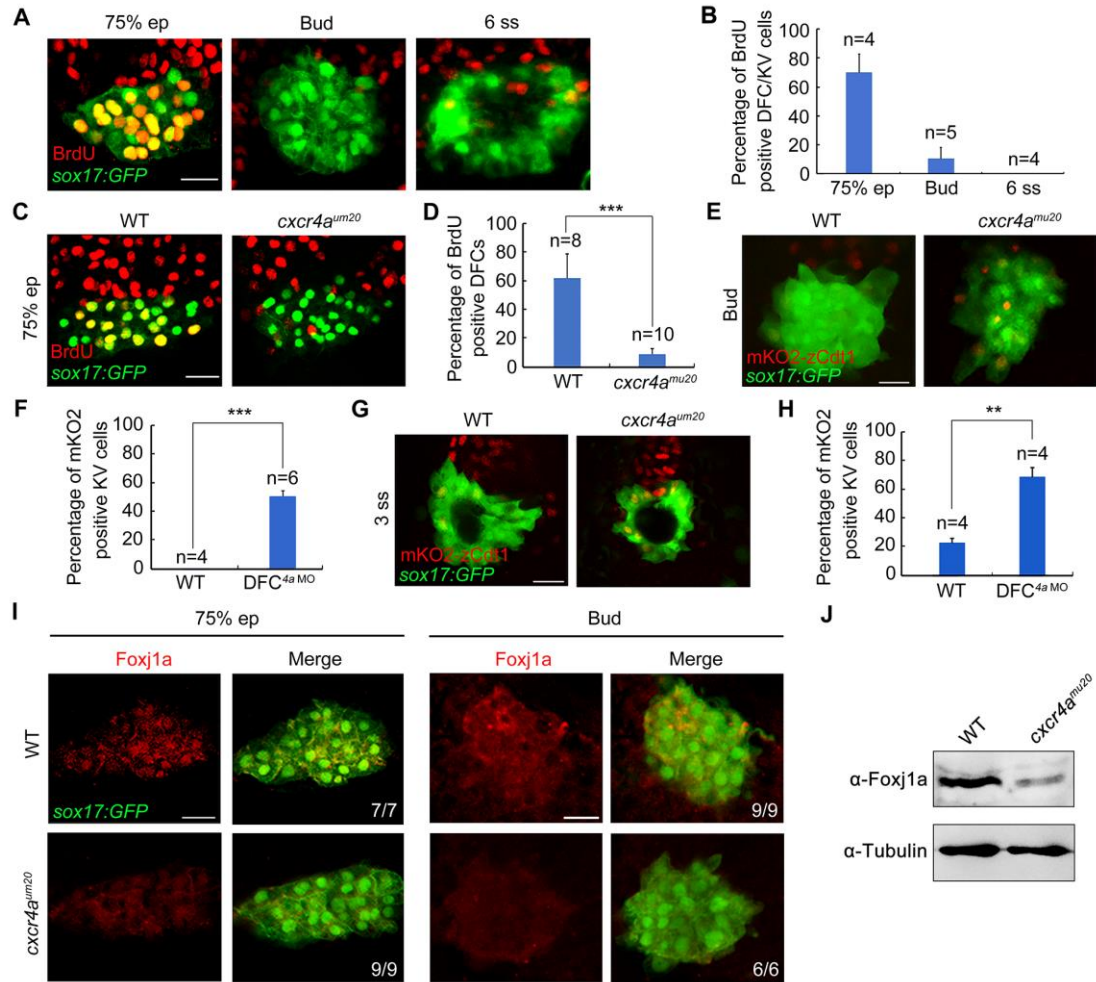

900

901

902

903

904

905

906

907

908

909

910 **Fig 3. Depletion of *cxcr4a* impairs G1/S transition and Foxj1a protein expression**  
911 **in DFCs.** (A-B) Representative confocal sections of BrdU-positive DFCs and KV  
912 cells at the indicated stages (A). Dorsal views with anterior on the top. Scale bar, 20  
913  $\mu\text{m}$ . The percentage of BrdU-positive cells among GFP-positive DFCs and KV cells  
914 were quantified from the indicated embryo numbers in three independent experiments  
915 and the group values are expressed as the mean  $\pm$  SD (B). (C-D) BrdU incorporation  
916 experiments showed reduced proliferating DFCs in *cxcr4a*<sup>mu20</sup> mutants at the 75%  
917 epiboly stage. Scale bar, 20  $\mu\text{m}$ . Statistical data from three independent experiments  
918 was shown in (D). Student's *t*-test, \*\*\**P*<0.001. (E-H) Depletion of *cxcr4a* inhibits  
919 the G1/S transition in DFCs. Representative confocal sections of wild-type and  
920 *cxcr4a*-deficient *Tg(sox17:GFP;EF1a:mKO2-zCdt1(1/190))* embryos at the bud and  
921 3-somite stages were shown in (E and G). Dorsal views with anterior to the top. Scale  
922 bar, 20  $\mu\text{m}$ . The percentage of mKO2-positive KV cells were quantified from three  
923 independent experiments (F and H). The significance of differences compared with  
924 the wild-type group were analyzed with the Student's *t*-test, \*\**p* < 0.01; \*\*\**p* < 0.001.  
925 (I-J) *cxcr4a* deficiency downregulates zFoxj1a protein expression levels. Wild-type  
926 and *cxcr4a*-deficient *Tg(sox17:GFP)* embryos were harvested at the 75% epiboly and  
927 bud stages, and then subjected to immunostaining (I) and western blot analysis (J)  
928 with the indicated antibodies. Scale bar, 20  $\mu\text{m}$ .

929

930

931

932 Figure 4

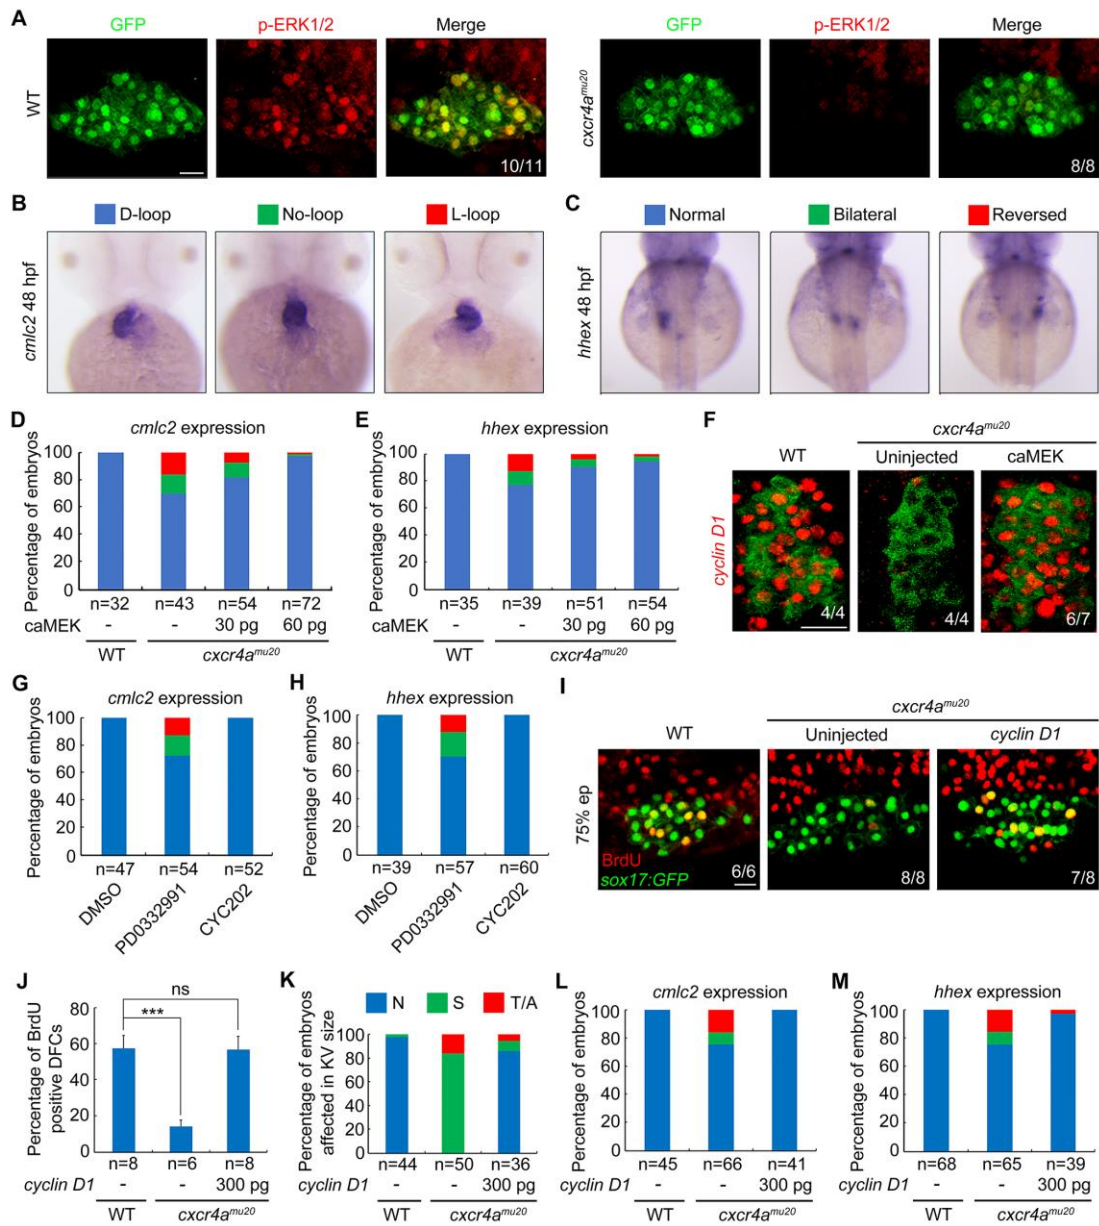

933

934

935

936

937

938

939

940 **Fig 4. Cxcr4 promotes Cyclin D1 expression through ERK signaling during DFC**  
941 **proliferation.** (A) ERK1/2 phosphorylation levels were dramatically decreased in  
942 *cxcr4a<sup>mu20</sup>* mutants. Wild-type and *cxcr4a*-deficient *Tg(sox17:GFP)* embryos were  
943 harvested at the 75% epiboly stage and subjected to immunostaining for p-ERK1/2  
944 (red) and GFP (green). All embryos were shown in dorsal views with anterior to the  
945 top. Scale bar, 20  $\mu$ m. (B-E) caMEK mRNA overexpression in DFCs rescued L-R  
946 patterning defects in *cxcr4a<sup>mu20</sup>* mutants. Different types of heart looping and liver  
947 laterality at 48 hpf in *cxcr4a<sup>mu20</sup>* mutants following mid-blastula injection of different  
948 caMEK mRNA doses were visualized by *cmlc2* and *hhex* expression (B and C).  
949 Quantitative data were shown in (D and E). (F) *Cxcr4a*-deficient *Tg(sox17:GFP)*  
950 embryos were injected with 60 pg caMEK mRNA at the 256-cell stage, and then  
951 harvested at the 75% epiboly stage for fluorescence *in situ* hybridization experiments  
952 with *cyclin D1* (red) and GFP (green) probes. Dorsal views with anterior to the left.  
953 Scale bar, 20  $\mu$ m. (G-H) Wild-type embryos were treated 0.5  $\mu$ M PD0332991 or 0.2  
954  $\mu$ M CY202 from the shield stage to bud stage, and then analyzed for L-R patterning  
955 defects at 48 hpf by *in situ* hybridizations with *cmlc2* and *hhex* probes. The proportion  
956 of treated embryos exhibiting each type of heart looping and liver laterality were  
957 shown in (G) and (H). (I-J) Reintroduction of *cyclin D1* into DFCs relieves DFC  
958 proliferation defects in *cxcr4a<sup>um20</sup>* mutants. *Cxcr4a*-deficient *Tg(sox17:GFP)* embryos  
959 were injected with or without 300 pg *cyclin D1* mRNA at the 256-cell stage, followed  
960 by coimmunostaining with anti-BrdU (red ) and anti-GFP (green) antibodies at the  
961 75% epiboly stage. Representative images were shown in (I) and the percentage of

962 BrdU-positive DFCs were indicated in (J). Scale bar, 20  $\mu$ m. Student's *t*-test,  
963 \*\*\* $P < 0.001$ . ns, no significant difference.(K-M) Statistical data shows that  
964 DFC-specific overexpression of *cyclin D1* rescued the defects of KV formation (K)  
965 and L-R patterning (L and M) in *cxcr4a* mutants.

966

967

968

969

970

971

972

973

974

975

976

977

978

979

980

981

982

983

984 Figure 5

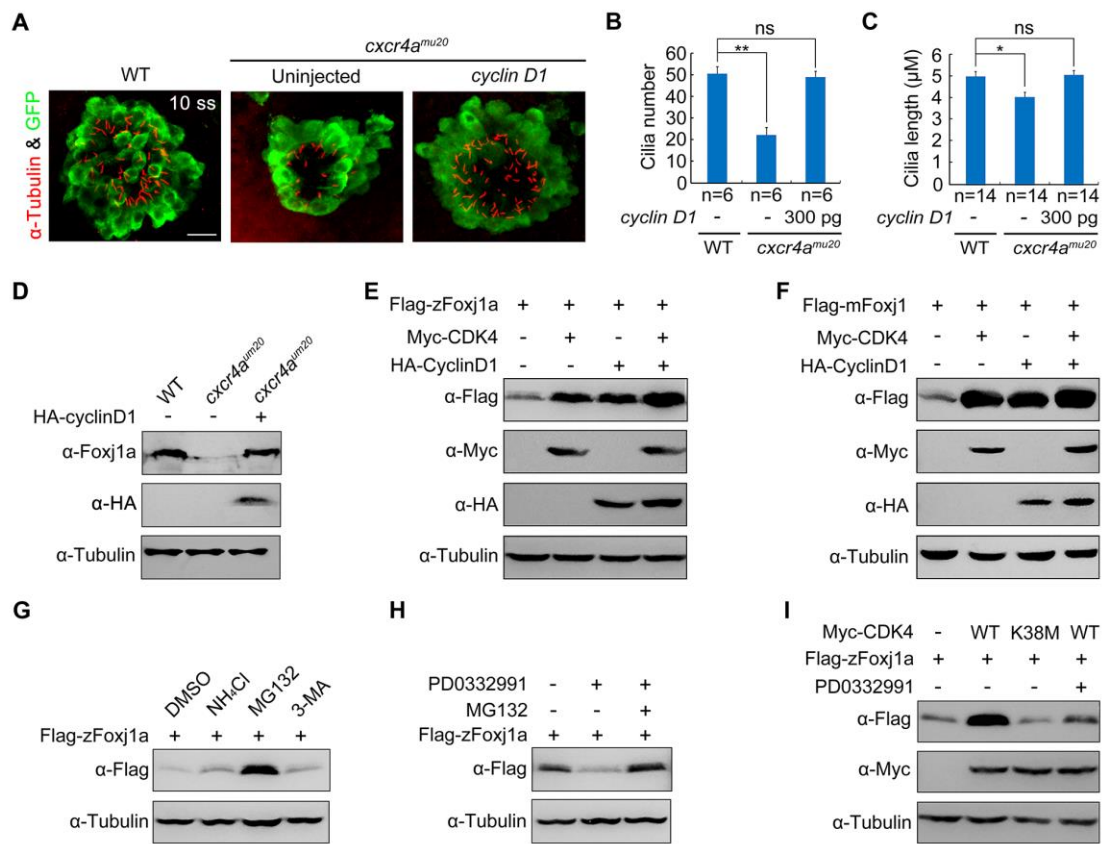

985

986

987

988

989

990

991

992

993

994

995

996



997 **Fig 5. CDK4 stabilizes Foxj1 through its kinase activity.** (A-C) Confocal images of  
998 10-somite-stage *cxcr4a*-deficient *Tg(sox17:GFP)* embryos injected with or without  
999 300 pg *cyclin D1* mRNA at the 256-cell stage (A). KV cells were labelled with  
1000 antibodies against GFP (green) and cilia were visualized by acetylated tubulin  
1001 immunofluorescence (red). Scale bar, 20  $\mu$ m. Cilia number (B) and length (C) were  
1002 analyzed. Student's *t*-test, \* $P$ <0.05, \*\* $P$ <0.01. ns, no significant difference. Note  
1003 that when *cyclin D1* mRNA was injected into *cxcr4a*-deficient DFCs, both the KV  
1004 cilia number and length were restored. (D) Western blots of total lysates from 75%  
1005 epiboly-stage wild-type embryos and *cxcr4a<sup>um20</sup>* mutants injected with or without 300  
1006 pg *HA-cyclin D1* mRNA at the 256-cell stage. Tubulin was used as the loading control.  
1007 Endogenous zFoxj1a protein levels in *cxcr4a<sup>um20</sup>* mutants was rescued by  
1008 DFC-specific overexpression of HA-cyclin D1. (E-F) CDK4 overexpression alone or  
1009 together with Cyclin D1 results in an obvious increase in zFoxj1a (E) or mFoxj1 (F)  
1010 expression. HEK293T cells were transfected with the indicated plasmids. Lysates  
1011 were analyzed by western blot using the indicated antibodies. (G) HEK293T cells  
1012 transfected with plasmids encoding Flag-zFoxj1a were treated with the lysozyme  
1013 inhibitor NH<sub>4</sub>Cl (20 mM) or the proteasomal inhibitor MG132 (20  $\mu$ M) or the  
1014 autophagy inhibitor 3-MA (5 mM) for 5 hours prior to harvest for immunoblotting. (H)  
1015 Lysates from Flag-zFoxj1a-expressing HEK293T cells treated with CDK4/6 inhibitor  
1016 PD0332991 (0.5  $\mu$ M) alone or in combination with MG132 (20  $\mu$ M) were subjected  
1017 to immunoblotting. (I) Overexpression of wild-type CDK4 but not its kinase mutant  
1018 stabilizes zFoxj1a protein. HEK293T cells were transfected with the indicated

1019 plasmids. PD0332991 (0.5  $\mu$ M) was added 5 hours before harvest. Note that

1020 PD0332991 treatment blocked CDK4-induced zFOxj1a stabilization.

1021

1022

1023

1024

1025

1026

1027

1028

1029

1030

1031

1032

1033

1034

1035

1036

1037

1038

1039

1040

1041 Figure 6

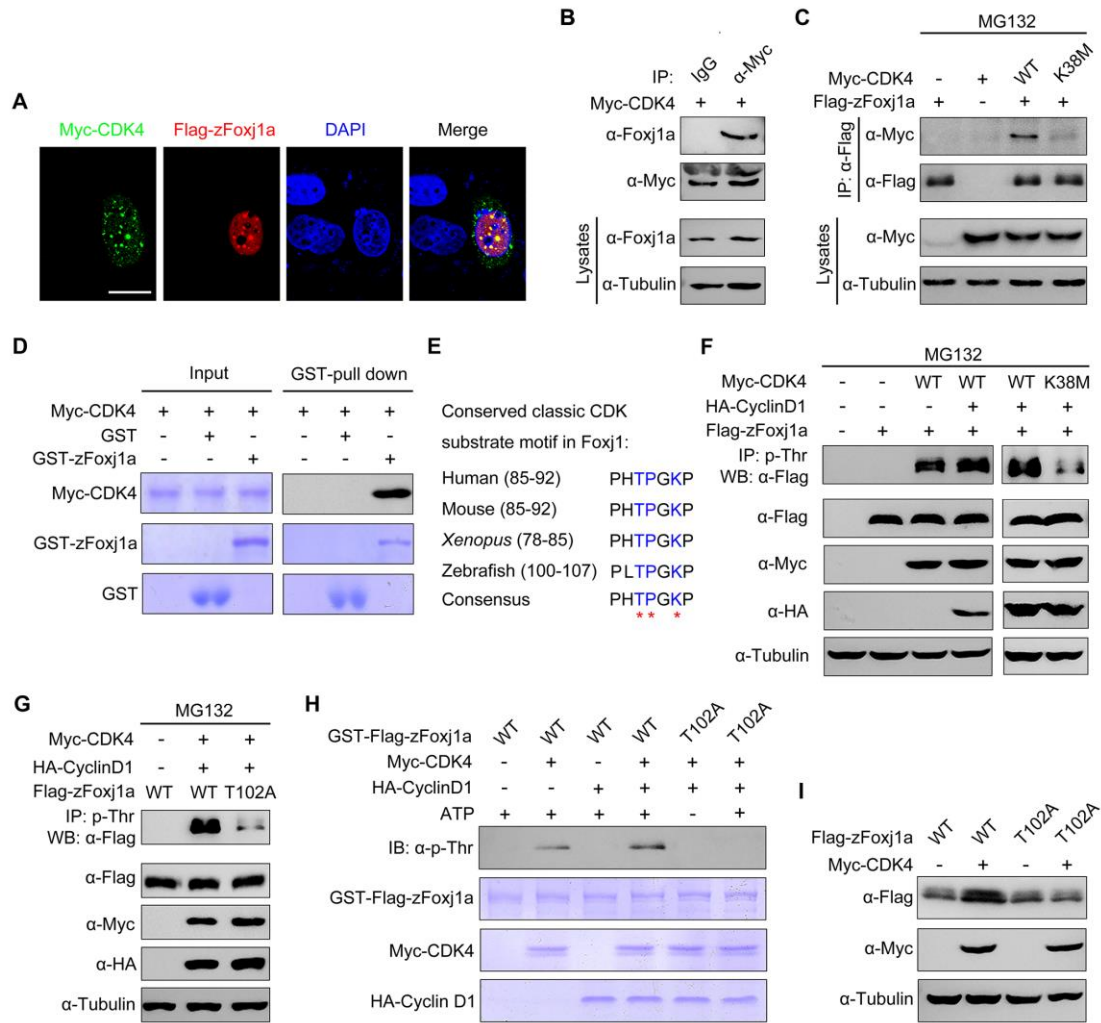

1042

1043

1044

1045

1046

1047

1048

1049

1050

1051

1052 **Fig 6. CDK4 phosphorylates zFoxj1a at T102 to suppress its degradation.** (A)  
1053 zFoxj1a and CDK4 show evident colocalization in HeLa cells. HeLa cells were  
1054 transfected with Flag-zFoxj1a and Myc-CDK4 and immunostained with anti-Flag (red)  
1055 and anti-Myc (green) antibodies. Nuclei were stained with DAPI (blue). Scale bar, 20  
1056  $\mu\text{m}$ . (B) Overexpressed CDK4 interacts with endogenous zFoxj1a. Wild-type embryos  
1057 were injected with 200 pg Myc-CDK4 mRNA at midgastrulation and then harvested  
1058 at the bud stage for immunoprecipitation with anti-Myc antibody or normal mouse  
1059 IgG. (C) CDK4 but not its kinase dead mutant interacts with zFoxj1a. HEK293T cells  
1060 were transfected with plasmids as indicated, followed by treatment with MG132 for 5  
1061 hours prior to harvest for immunoprecipitation. (D) Direct binding of CDK4 to  
1062 zFoxj1a *in vitro*. GST, GST- zFoxj1a and Myc-CDK4 were expressed in bacterial  
1063 cells and purified. Myc-CDK4 proteins were incubated with GST or GST-zFoxj1a.  
1064 The presence of Myc-CDK4 in the protein complex pull-downed by Glutathione  
1065 agarose was assessed using an anti-Myc antibody. Input proteins were examined by  
1066 Coomassie blue staining. (E) Conserved CDK substrate motifs in Foxj1 proteins from  
1067 different species. Red stars indicate critical residues in the CDK substrate motifs.  
1068 (F-G) CDK4 phosphorylates zFoxj1a at T102. HEK293T cells were transfected with  
1069 the indicated plasmids. CDK substrates were immunoprecipitated using a  
1070 phospho-threonine-proline antibody and blotted with anti-Flag antibody to detect  
1071 phosphorylated zFoxj1a or zFoxj1a-T102A. zFoxj1a-T102A is an unphosphorylated  
1072 form of zFoxj1a. Note that wild-type zFoxj1a could be phosphorylated by CDK4 but  
1073 not by the CDK4-K38M mutant (F). CDK4-mediated phosphorylation was nearly

1074 abolished in zFoxj1a-T102A (G). (H) *In vitro* kinase assays revealed that CDK4  
1075 phosphorylates wild-type zFoxj1a but not the zFoxj1a-T102A mutant. zFoxj1a and  
1076 zFoxj1a-T102A proteins were purified from bacterial cells and incubated with  
1077 recombinant Cyclin D1 and CDK4 proteins in the presence or absence of ATP.  
1078 Phosphorylation of zFoxj1a and zFoxj1a-T102A was detected by western blot using a  
1079 phospho-threonine-proline antibody and input proteins were examined by Coomassie  
1080 blue staining. (I) Ectopical CDK4 expression is unable to stabilize zFoxj1a-T102  
1081 mutant. Lysates from HEK293T cells transfected with the indicated plasmids were  
1082 subjected to immunoblotting.

1083

1084

1085

1086

1087

1088

1089

1090

1091

1092

1093

1094

1095

1096 Figure 7

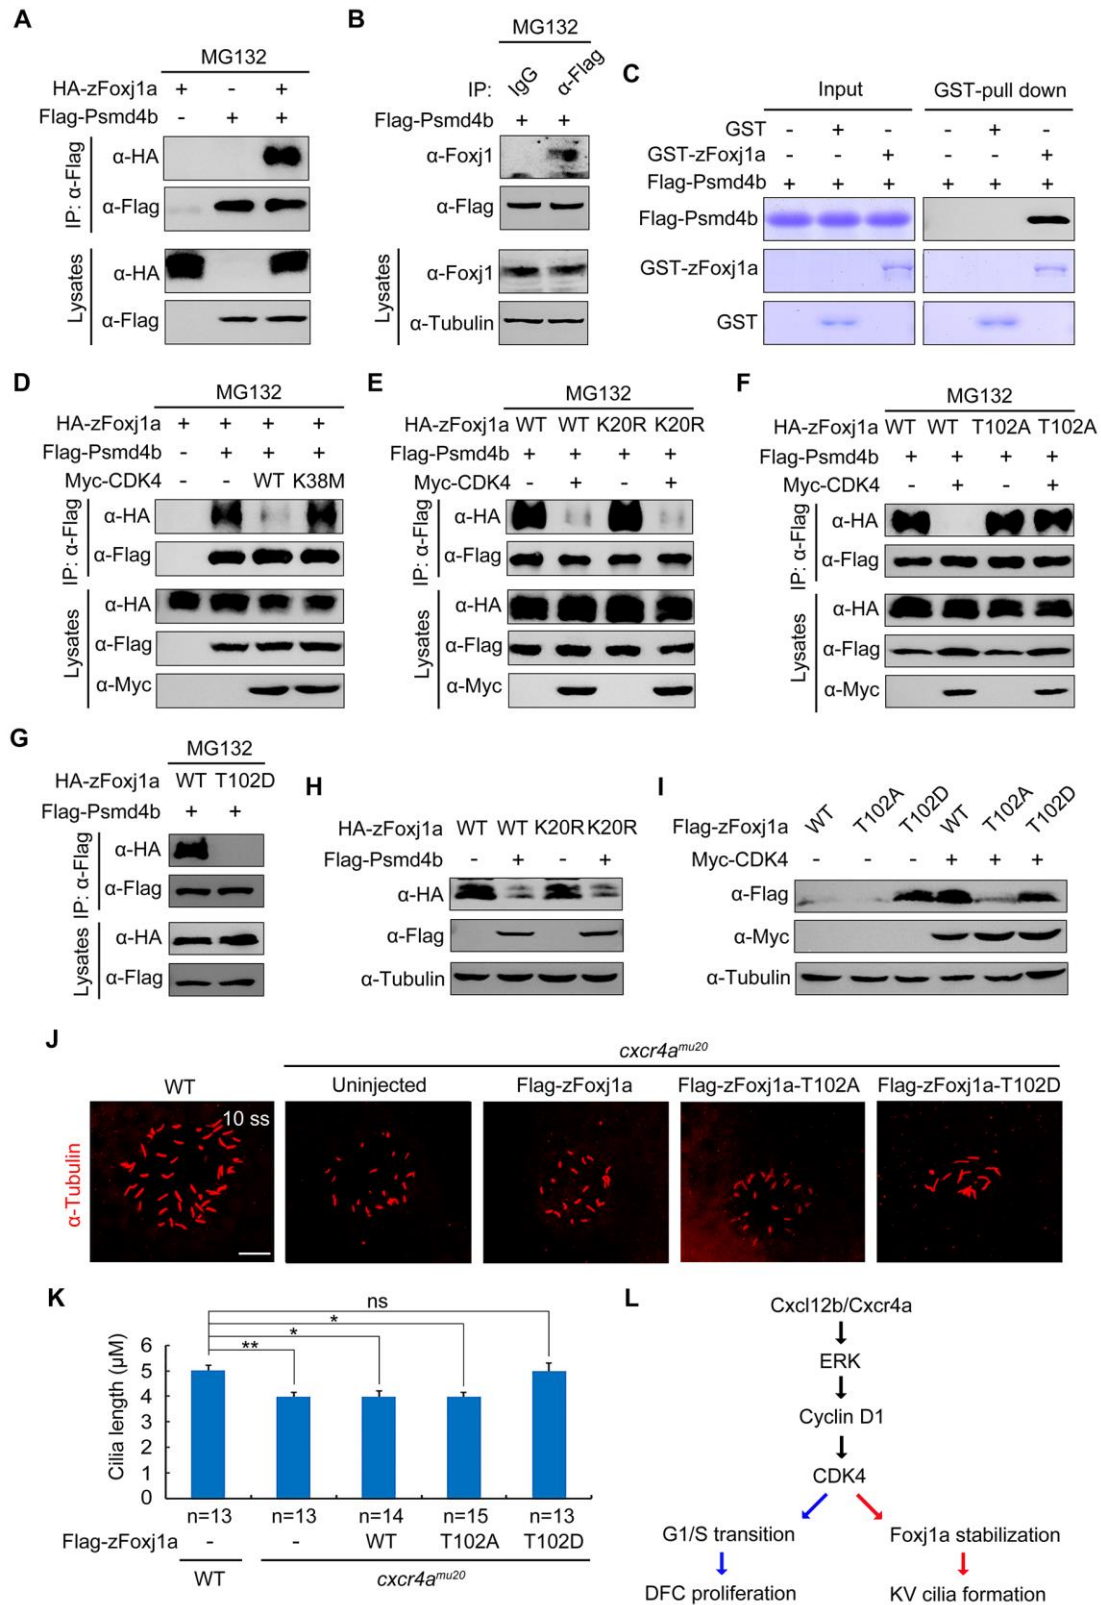

1097

1098

1099

1100 **Fig 7. zFoxj1a undergoes Ubiquitin-independent proteasomal degradation via a**  
1101 **direct interaction with Psmd4b.** (A-B) Flag-Psmd4b interacts with overexpressed or  
1102 endogenous zFoxj1a. HEK293T cells transfected with the indicated constructs (A)  
1103 and bud-stage wild-type embryos with DFC-specific expression of Flag-Psmd4b (B)  
1104 were subjected to immunoprecipitation with the indicated antibodies. (C) *In vitro* GST  
1105 Pull-Down assays reveal a direct interaction between zFoxj1a and Psmd4b. Purified  
1106 GST or GST-zFoxj1a proteins were incubated with recombinant Flag-Psmd4b. The  
1107 presence of Flag-Psmd4b in the protein complex which was pull-downed by  
1108 Glutathione agarose was assessed by western blot and input proteins were examined  
1109 by Coomassie blue staining. (D-E) CDK4 kinase activity is required for its inhibitory  
1110 effect on the association between Psmd4b and zFoxj1a. HEK293T cells transfected  
1111 with the indicated plasmids were treated with MG132 for 5 hours prior to harvest for  
1112 immunoprecipitation. Note that ectopically expressed CDK4 efficiently disrupted the  
1113 association of Psmd4b with zFoxj1a (D) or its lysine-free mutant zFoxj1a-K20R (E),  
1114 while overexpression of the CDK4 kinase deficient mutant CDK4-K38M had no  
1115 effect on their interaction (D). (F-G) Psmd4b has a much lower affinity for  
1116 zFoxj1a-T102D. zFoxj1a-T102A is an unphosphorylated form and zFoxj1a-T102D is  
1117 a phospho-mimicking mutant of zFoxj1a. Note that Psmd4b was particularly  
1118 associated with zFoxj1a and zFoxj1a-T102A (F), but was unable to bind  
1119 zFoxj1a-T102D (G). The association between Psmd4b and zFoxj1a-T102A was  
1120 unaffected by CDK4 overexpression (F). (H) Psmd4b overexpression induces a  
1121 dramatic reduction in zFoxj1a expression. Note that a similar reduction in the

1122 expression level of the lysine-free mutant zFoxj1a-K20R was observed upon Psm4b  
1123 overexpression. (I) Comparison of protein stability in wild-type zFoxj1a and its  
1124 mutants. HEK293T cells were transfected with the indicated constructs and  
1125 harvested for western blot analysis. In comparison to wild-type zFoxj1a and its  
1126 T102A mutant, the zFoxj1a-T102D mutant exhibited greater stability, but could not be  
1127 further stabilized by CDK4 overexpression. (J-K) DFC-specific overexpression of  
1128 zFoxj1a-T102D in *cxcr4a<sup>um20</sup>* mutants restores KV cilia length. Confocal images of  
1129 10-somite-stage *cxcr4a*-deficient embryos were injected with 200 pg of wild-type  
1130 *zfoxj1a* or *zfoxj1a-T102A* or *zfoxj1a-T102D* mRNA at the 256-cell stage. The resulting  
1131 embryos were harvested at the 10-somite stage for immunostaining using an antibody  
1132 against acetylated tubulin (J). Scale bar, 20  $\mu$ m. Statistical data for cilia length were  
1133 shown in panel K. Student's *t*-test, \* $P < 0.05$ , \*\* $P < 0.01$ . ns, no significant difference.  
1134 (L) A schematic diagram showing the regulatory mechanism of Cxcl12/Cxcr4a  
1135 signaling in DFC proliferation and cilia formation.

1136

1137

1138

1139

1140

1141

1142

1143



1144 **Supporting information**

1145 **Supplemental Figures**

1146 S1 Figure

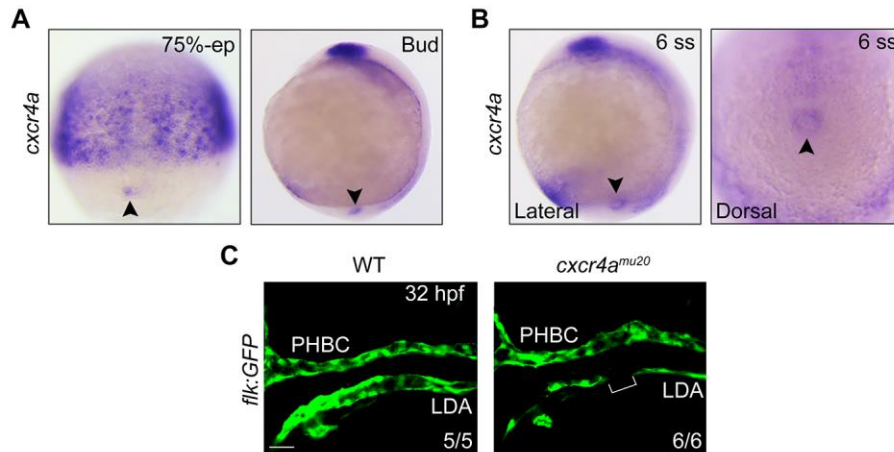

1147

1148 **S1 Fig. The expression of *cxcr4a* in DFCs and KV cells.** (A) *cxcr4a* expression  
1149 during gastrulation. *In situ* hybridization of *cxcr4a* in embryos at the 75%-epiboly  
1150 stage (Dorsal view with animal pole to the top) and bud stage (Lateral views with  
1151 animal pole to the top). Black arrowhead indicates the DFCs. 75%-ep, 75%-epiboly.  
1152 (B) *cxcr4a* expression at the 6-somite stage. Lateral view was shown with animal pole  
1153 to the top in the left panel and dorsal view was shown in the right panel. Black  
1154 arrowhead indicates the KV. (C) Confocal images depicting the formation of the  
1155 lateral dorsal aorta in live *Tg(flk:GFP)* embryos. Scale bar, 50  $\mu$ m. LDA, lateral  
1156 dorsal aorta; PHBC, primordial hindbrain channel.

1157

1158

1159

1160

1161 S2 Figure

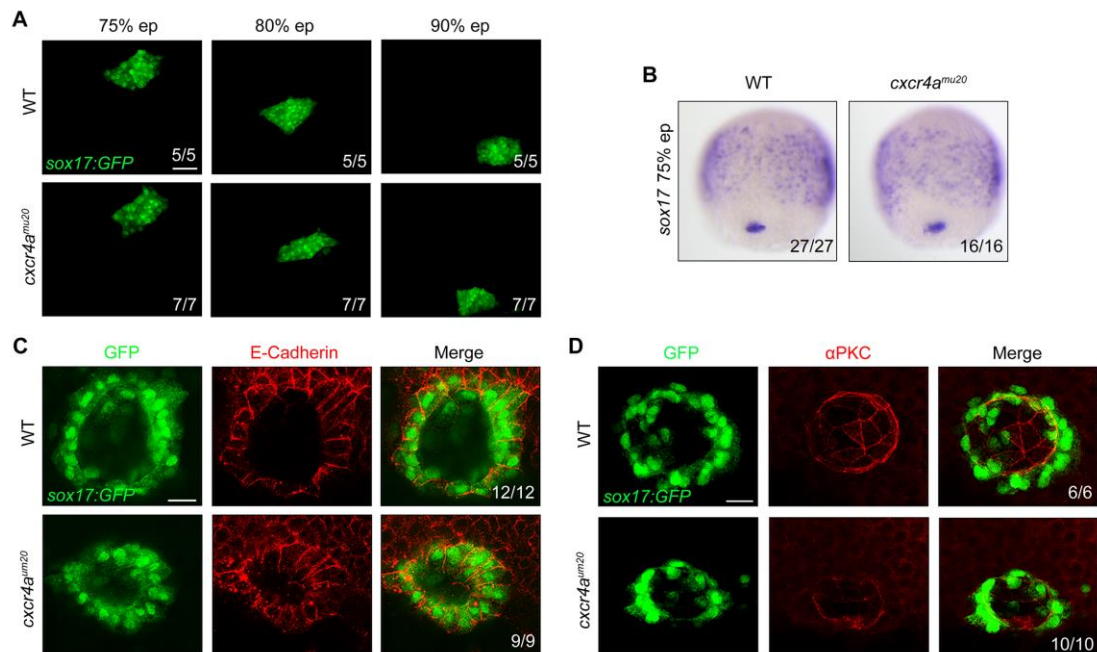

1162

1163 **S2 Fig. *cxcr4a* is unnecessary for the specification, clustering and collective**  
 1164 **migration of DFCs and dispensable for the polarized differentiation of KV cells.**

1165 (A) Time-lapse confocal images showing DFCs migration in wild-type and *cxcr4a*<sup>mu20</sup>  
 1166 mutant embryos on a *Tg(sox17:GFP)* background from 75%- to 90%-epiboly stages.

1167 Scale bar, 50  $\mu$ m. (B) Sox17 expression was examined by *in situ* hybridization in  
 1168 wild-type and *cxcr4a*<sup>mu20</sup> mutants at the 75%-epiboly stage. (C-D) Wild-type and

1169 *cxcr4a*-deficient *Tg(sox17:GFP)* embryos were harvested at the 10-somite stage for  
 1170 immunostaining. KV cells were labelled using an antibody against GFP (green).

1171 Expression of the basal-lateral marker E-cadherin (C) and the apical marker  $\alpha$ PKC (D)  
 1172 were visualized using the indicated antibodies (red). Scale bar, 20  $\mu$ m.

1173

1174

1175

1176 S3 Figure

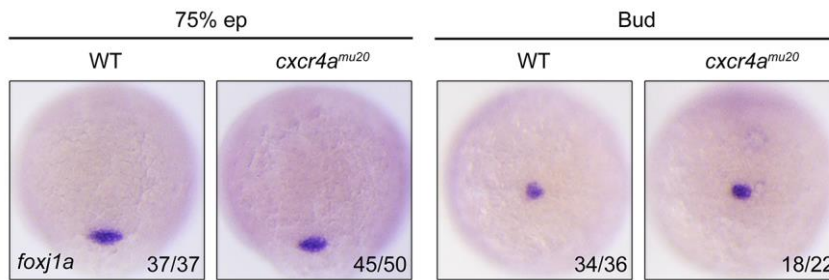

1177

1178 **S3 Fig. *cxcr4a*<sup>mu20</sup> mutants exhibit a normal expression of *cxcr4a* transcripts.**

1179 *cxcr4a* expression was examined by *in situ* hybridization at the 75%-epiboly and bud

1180 stages in wild-type and *cxcr4a*<sup>mu20</sup> mutant embryos.

1181

1182

1183

1184

1185

1186

1187

1188

1189

1190

1191

1192

1193

1194

1195

1196 S4 Figure

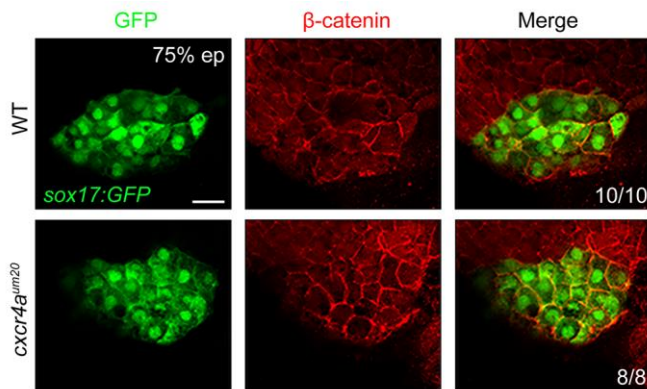

1197

1198 **S4 Fig. Inactivity of *cxcr4a* does not affect  $\beta$ -catenin nuclear accumulation in**

1199 **DFCs.** Wild-type and *cxcr4a<sup>mu20</sup>* mutants were harvested at the 75%-epiboly stage for

1200 immunofluorescence assays using the indicated antibodies. Scale bar, 20  $\mu$ m.

1201

1202

1203

1204

1205

1206

1207

1208

1209

1210

1211

1212

1213

1214 S5 Figure

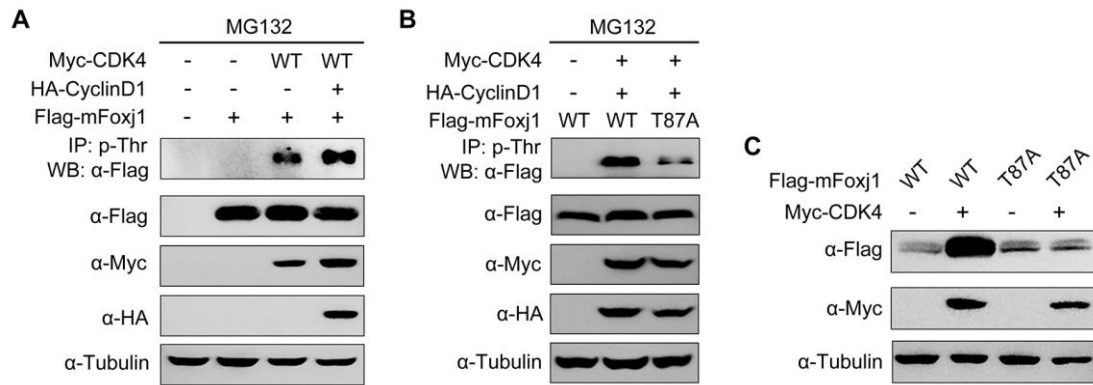

1215

1216 **S5 Fig. CDK4 phosphorylates and stabilizes mFoxj1.** (A-B) HEK293T cells were

1217 transfected with the indicated plasmids and then harvested for immunoprecipitation

1218 with a phospho-threonine-proline antibody. Phosphorylation of mFoxj1 (A) and its

1219 T87A mutant (B) was detected by western blot. Note that the CDK4-mediated

1220 phosphorylation of mFoxj1 was clearly decreased in the T87A mutant. (C) Western

1221 blots of total lysates from HEK293T cells transfected with the indicated plasmids.

1222 Note that CDK4 overexpression could stabilize wild-type mFoxj1 but not the T87A

1223 mutant.

1224

1225

1226

1227

1228

1229

1230

1231

1232 S6 Figure

**A**

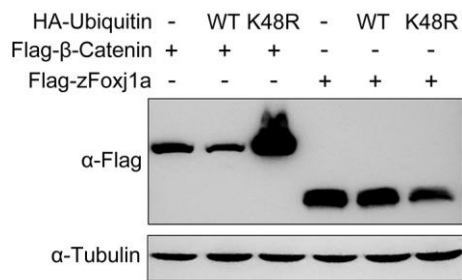

**B**

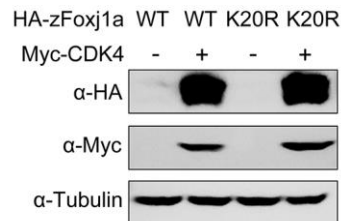

1233

1234 **S6 Fig. Proteasomal degradation of zFoxj1a is independent of ubiquitin**

1235 **modification.** (A) Overexpression of Ub K48R/G76A was unable to stabilize zFoxj1a.

1236 Flag-tagged  $\beta$ -catenin and zFoxj1a were co-expressed with wild-type Ub or Ub

1237 K48R/G76A, a dominant negative inhibitor of chain formation and degradation. Cell

1238 extracts were immunoblotted with the indicated antibodies. (B) CDK4 overexpression

1239 similarly promoted the expression of wild-type zFoxj1a and its lysine-less mutant

1240 K20R.

1241

1242

1243

1244

1245

1246

1247

1248

1249

1250

1251 S7 Figure

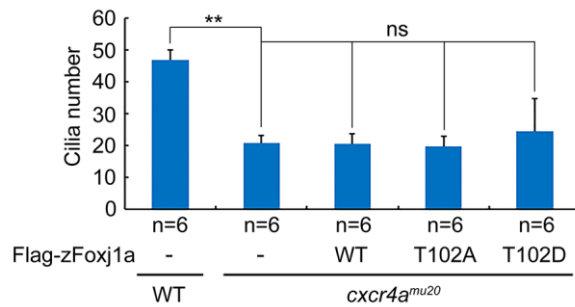

1252

1253 **S7 Fig. The decrease in the number of cilia in *cxcr4a<sup>um20</sup>* mutants was not**  
1254 **alleviated by DFC-specific overexpression of wild-type zFoxj1a and its T102A**  
1255 **and T102D mutants, respectively.** *cxcr4a*-deficient embryos were injected with 200  
1256 pg of wild-type *zfoxj1a* or *zfoxj1a-T102A* or *zfoxj1a-T102D* mRNA at the 256-cell  
1257 stage. The resulting embryos were harvested at the 10-somite stage for  
1258 immunostaining using an antibody against acetylated tubulin. Cilia length was  
1259 quantitatively analyzed using ImageJ software. Student's *t*-test, \*\* $P < 0.01$ . ns, no  
1260 significant difference.

1261

1262

1263

1264

1265

1266

1267

1268

1269

1270 **S1 Video. Wild-type control embryos, normal KV flow.** Wild-type *Tg(sox17:GFP)*  
1271 embryos were injected at the 6-somite stage with fluorescent beads and imaged using  
1272 a Nikon A1R+ confocal microscope at the 10-somite stage. Dorsal view with anterior  
1273 to the top.

1274

1275 **S2 Video. *cxcr4<sup>mu20</sup>* mutant embryos, aberrant KV flow.** *cxcr4<sup>mu20</sup>* mutant  
1276 embryos on a *Tg(sox17:GFP)* background were injected at the 6-somite stage with  
1277 fluorescent beads and imaged using a Nikon A1R+ confocal microscope at the  
1278 10-somite stage. Dorsal view with anterior to the top.

1279
